# Supplementary material
Source: publisher figshare collection journal article supplement (https://tandf.figshare.com/ndownloader/files/35113547)
Supplement: Supplementary file 1 [file 35113547]

xread
889 230
Petrolacosaurus_kansensis	0100100000010-00001010000002000003010?300[1 2]10000-0--10---0---0--000-0001000400000-0-000--0000000-00010-?03?0100001101-0-000000000-000000-0000--000?0001??3???1101-0-0100000000000-0-0?-10001000000000000110?0001010001000?00000??00-00-10?00?2?0????0?100?--??????0-000-0000101010-0-1000010-00100000?00000000000010000000?0000020--00010110100?010100[1 2]00100-0010200-00??2[0 1]0110020000??0030000?00?0?…
Orovenator_mayorum	0?00100000010-0010???00000020100030100301100000-?--10---0---0--000-20010004?0??0-0-001--0100000-00030000??00000?1101-0-000000?????0?????????????????????????11?1-0-0100?00?????0-??00-??00000010000000000100002?????????????????0?????????0????000000100???????????000-0000000010-0-10000[0 1]??0?00?001???0?00010[0 1]00000?0?00???????0--???10??0?0000[0 1]?100200??????????????????????????????????0????????…
Acerosodontosaurus_piveteaui	0?0?????????0-?0?0???????????????????????????????-???--??????--0???0??10005???????-010--000?000-??010000?0?????0?1?1??-0001?00???100?0????????0002?????????????1???????????????0-??0?-????????????????????0???1?????????????????????????????????????????????????????00-???2???????????00??10??0?????000??100?00000?000000?0000000--??0?????????00?1???0?-?0?0011?01-00000001-002??????1???????0????????????????…
Hovasaurus_boulei	??000-?0?????????0[0 1]????????????????????????????????????????????????????00?[1 2 3 4 5]????????????????000????0[1 2]?100?0?????0?1?1-?-??11?1000?100001?0010000002000???????0101-0-010????0????0-????-1????0?????0000101?1?????01000?00???0?01??01020-100???0?0????1?100??????????????????????????????????1???0????????00????????????0000?0000020--0?010010000?00?100400?00?00?[0 1]000-00000001400210010-001…
Youngina_capensis	?1000-0000010-000011?00000010100?31110?01300000-1--00---0---0--00??0001000410000?0-010--??10100-10020000000000001101-0-000100100-1000010101000000200010020001101-0-01000000000002000?-00000000100000100101000?10100011001000011001000-1000002-0000010100?--0000000-000-00?010?[0 1]10-0-?0000110?00000010?00010010[0 1]0[0 1]000?0000?0000000--0??0????0000000100?00-00-0?11000-00000001-002?00?11[0 1]01000012…
Claudiosaurus_germaini	0[0 1]000-01000?0-?0?01[0 1]?000??12?0000[2 3]0????0?000?00-?-??---?10100--00??0??100?[4 5]?0?????-010--??-0[0 1]00-0000------0?0000?1010?-??0?00000?000000?001?--000200?1200--0010100-010?????????0-?-0?-??00000010003--00100?????010??????????????0?????????0?0?000??1?100???????????000-1000?00010-0-10000?10?????00?0?0???00?0100000?000000000000--2?0?0110000?00?100200-00-0024?00-00??0011-00200?00-10100…
Elachistosuchus_huenei	??000-0????????0?0[0 1][0 1]?0????????????????????????0-????????1???1??00??0?0000?[4 5]????????0??????00000?0??20000-00?0???210000-00[0 1]??0??0??00?0?????????????????????????1??????0?0???????????????0?[0 1 2]001?110????0112000?1010?01?1??????????1??1?0?0?0??????00???00??????1?01?020-000???001????1[0 1]00??101?0??0??0?0??10010[1 2]00001?10???0000???--???????????????1???????0???1?000000000001?1?[0…
Feralisaurus_corami	?100????????0-0?[0 1]0?[0 1]?????????????????????????00-?-???---?????--00??0?010004???????-0??--???000?-??010?0?-?0???????????-????????????0???????????????????????????????????????????2???????????????????????????????????????????????????????????????????????????????????020-0000??00?????0000??10?00???01??????2010[1 2]?0000?00????????????0???????????????????????????????-??????????02???????????????0???…
Paliguana_whitei	0?000-00????0-?000???0???????????????????????????-???--?1??01--???????100???0?????-020--??00000-00010000-0???001?10000-0010000[0 1]000000010??????00020001200--01??0-????0000?2-1??1?000????0?001??10?[0 2 3 5]?0?????00?02?1?0???????000????????????????????????????????011????[1 2]0-???[0 1]001??????0100?????00?????0?????2???[0 1]01000???????????????????????????????????????????????????????????????????…
Fraxinisaura_rozynekae	0?0010?1000?0-?000???000?0??00?003?10??0?2???????-???--?10101--??0-000100?[4 5]??????0-???--??0010?-0001?100-0000????1?0??-0????0?00?00010??????00?????????????????000-2-??????????????????????00?10?000200102????1??????????????????1??????????0?0????1?100???????????0????00000?0??????000??????????????????2010[0 1]00100?1?0??????????????????????????0???????????????????????0???0???????????????[0 1]0?0?…
Marmoretta_oxoniensis	0?00001200010-0000?0[0 1]0000001000003010?30010???0-?--10---10101--??0-00010004[0 1]00??-?-010--10?0001-00?10000-0000001011000-001100000??00?01?0?????0??????1????????10-0-2-??????????1?0?0?00????001[0 1]0?002100???01?11???0???????0001??010?11000??????00??????0???????????02???0?[0 1]00001?????000????1000??????????2010[1 2]00000?1000?00000?????????????????????????????????001??0000?0???????????10???…
Huehuecuetzpalli_mixtecus	?2000-[0 1]100010-0010?1??000012010003010?30?10??00-1--00---10101--0???000100?200000-0---------0100-0000------000001110000-0?1000??0?000001?10000000000000------1?1000-???????2-?00210?1?10????????????????????????0?00????????????????????????????????????????????????020-?0000010110[1 2]1?0000???0000?10????1?0201010?0001?00????????0--0???001??0??00?1????0?00-00?????-00?10????002?00?0-11100?01211?00001…
Megachirella_wachtleri	0??01001????????00????????????????????????????0-????????10?????00?????1000?????????0????0?00100?0??20000-00?0?01?10000-?????0?0?00????100--1001-----10000-00??1000-020????2-10?20000?0?????0?????01?-0?102??0?0???????0??????????10?0-000?0?0?0????101[0 1]0????????????20-?????????11???[0 1]00??21?00?1????1????2???[1 2]?00?0?10?0??????00--0??0001???0???????1??-00?00??1??00???????-00???????????????1????…
Salvator_rufescens	01000-0100010-0000001010000100000301--300110000-1--10---10001--00100111000200000-0-010--11-0100-0010------0-0001010000-001000000000000100--0011-----00------111000-2-000002-10021000-1000131-11020----01020111001110110040-0001001020-0000010000000100000000011110-020-00010010110[1 2]100000020000110011101100111[0 1]000001100000000000--001200100000000100700-00-0024100-00010000-10210000-11100101201000011…
Planocephalosaurus_robinsonae	0?000-0000000-0000?01000000201000301--300210?00-?--10---10011--000-0001000300000-0-020--??0000?-00-20010?0000001010100-0011000200000001000010001010000------2-10-0-0100?002-10022000?00?000001101012-00002000?1???0??????????0??01010-10??0?0?000????110???????????020-?02200?00110-0000--2010000-011????1301020[0 1]010?0000?0000000--??1?001?000?00?1???0??00?00?2?00-00010101?002?00?1111???00??000000110100…
Gephyrosaurus_bridensis	0?00100000010-0000?00000000101000301--300110?00-1--10---10001--000-0001000500000-0-020--0000000-00-20000-0000001110000-001100020000000100010100000000[0 1]000--02-10-0-0100?0?2-10021000?000000001101011-0010200011???0???????0000??01010-10000?0?000??10110?01????????020-00020010011[1 2]11000012010010101100??12010200010?0000?00000??????1000?00000000000?0??00?00?3101-00010101?002?0011011?0??01[0 1]0?0?…
Clevosaurus_hudsoni	01000-0100010-00000010100-0---000302003005--?00-1--10---10001--000-01010001[0 1]0000-0--------00000-00-30010-?000000010100-0011000200000001000000-00020000------110000-01000002-100220000100002011001002200002??1110100011001000001?01000-1000000-0000010010???0?11??0-020-002000001110-00000?20100000010001103010201010?0000?0000?00--201000100000000000200-0?-00?????-0??1010?-0021001111110?0?11000000110100…
Sphenodon_punctatus	01000-0200010-00100010110-0---000301003005--000-[0 1]--10---10101--000-0101000300000-0--------00000-0012001000000000110200-0001001000000001010111100020000--2---2-00-0-00000002-1002[0 1]00000100020110010----0002010110110011002000001001000-1000000-000001011000?0011100-020-0010001010-[1 2]1100001101000010111011030102010101000000000000--201000100000000000300-00-0011001-00010101-00210010-1110000010000…
Colobops_noviportensis	???00-02????0-?000?0??1??????????????????????0???-???--?10?01--?0??????????00?0??0--------?[0 1]000-??-?0?????000000100?-0-000100?20-00?00??1???????????0?????????0?-??0?????????0??????????0????11????????00??0001?????????????????????????????????????????????????????2??????????????????????????????????????????????????????????????????????????????????????????????????????????????????????????????????????…
Cteniogenys_sp	0?10100010??0-??00???00?[0 1]??[3 4]?000?100---00[1 2]00??0-0--10--?1[0 1]101--000-00010004?0???-?-010--0100000-000200?00?1-0000-102-0-0?10010?0-000001???????0???0??10?3??1??00-0-2-?0?0?2-???130?0000101?000?0??01000???0??11???0??2????0000??010?1000000?0?000?0?0120?01?0??????000-?0?01000?11???00001????0???????????0010000100?101??00000?????002????000?????0??????????110010??????????????????0????00??…
Simoedosaurus_lemoinei	0?100-0010200-000030?000011?0?0000-0---00301?00-0--?0---10001--000-00000005101?0-0-010--??00000-00-21000201-0000-102-0-002--1000-0000011000010000000110020022-00-0-2-001102-1001?0100?01010000?0103--0011000011110001200101000101101101000000-0000010120?01?000-0??000-00010000110[1 2]01000011000000101010???0010100000?101000000010--200000001000000100100-???0010001-00000001-?0211010-0?1000?1?110001110100…
ISIR_1132	??????????????????????????????????????????????????????????????????????????????????????????????????????????????????????-????????????????????????????????????????????????????????????????????????????????????????????????????????????????????????????????????????????????????????????????????????????????????????????????????????????????????????????????????????????????????????????????????????????????????????…
Aenigmastropheus_parringtoni	??????????????????????????????????????????????????????????????????????????????????????????????????????????????????????-??????????????????????????????????????????????????????????????????????????????????????????????????????????????????????????????????????????????????????????????????????????????????????????????000101110000?????????????000?1???????????1???100?000?0????[0 1]???????????????????????????…
Protorosaurus_speneri	?1000-0200010-000011??0000020100?3011000?300?00-1--10---10???--00??0001000410000-0-01?--0000000-0001??00-00000000100-0-??0000000-0000010001?100000000???????2-[0 1]0-0-[0 1 2]?10000??10012?00?0?0??200?????[0 1]????????????010?0110010?????????1???????????????????????????????000-?0?2000010-[1 2]010000020000?00010?????0010[0 1]00000?100101111020--1?0[0 1]0011?1000[0 1]?100410310?2110?100010010010101?…
Dinocephalosaurus_orientalis	?-100-0000?10-0010?1?0000?120?000311?000?10??00-1--00---1100?--00??3?0100?3?00?1-0-010--??-0000-0000------0??00??10?-0-??0101020-0100010000?0-010?0000------2-??-0-0[0 2]1????2-?0?1??1??0?????1-??0??----0????????????????????????????????????????????????????????????000-?001?0?0?????1?000?0-??0???????????[0 1]00010?100??00???????[0 1]???3??1???1?10????10???1-1??21?0??0-????????-102??0???0???????01???…
Amotosaurus_rotfeldensis	0-?0100?????????10????[0 1]0?0??????????????0110?00-????0???1110???00??000?0004????????0???????0000?00?1?000-00?0?001?0???-???????????????????????????????????????????????????????????????????2000??003--00102??????????????????????0?????????0?0?0????1?000???????????000-00?200?010-0-?0000??0000???0??????100101001?011001?1100?0???2???1112210??0?10?[1 2]11-1??211[1 2]00?-01??0011-[0 1]02000111??20????0…
Macrocnemus_bassanii	01000-0200010-000011000000130000010200000000?00-0--1----11101--000-000100041000?-?-010--???0000-000?????-?000000100100-0101010000010001010011000?00?010000002-01-0-2-100002-10?1100000000?0010??[0 1]00120000??????01000110000100?10010[0 1]101010000-0??0010?00???0010-00-020-000000001100-10000011000?000?0?0??1001000000011001?1?1000110200?1111210?10?111[1 2]10-[0 1]??21130?0001000011-10[1 2]0001111020?…
Macrocnemus_obristi	??????????????????????????????????????????????????????????????????????????????????????????????????????????????????????-????????????????????????????????????????????????????????????????????????????????????????????????????????????????????????????????????????????????????????????????????????????????????????????????0?????????????????????????????????????????????????????????00??????1?????????????????????…
Macrocnemus_fuyuanensis	?1000-?200?10-01?0?1??00001200000[0 1]020?[0 2]0?00??00-0--0?---11?0?--00??00010??51000100-010--??00000-0002?000-0000000010100-??010000000000010?0011000010000------2-[0 1]1-0-2-1???????0011?00?0??????????????????????????????????????????????????????????????????????????????010??0001?010-111?0000200000000???????[0 1 2]01000?000??001?????001102???1111210????1?1110-11?[1 2]11??0??01??????-?010001111?[…
Fuyuansaurus_acutirostris	0??0???2?[0 1]???????0?????????????????????????????????????????????????????000???????????????????0??00????????????????????-??????0?0???000???????????????????????????????1?????????1???????????????????????????????????????????????????????????????????????????????????????0?0[0 2]???????????00??20??0???????????00?010??00??0?1???1???0103???????210?10?1??110?11?2111??00?1???0???10[1 2]?00?111???????01??0…
Pectodens_zhenyuensis	01000-??00010-00?0?11?00??14?0?0?20????0?00??00-?-?00---1[0 1]?01--00??00010??4??00?-?-010--??-0?00-0010------?0?00??1????-??0??00200010?010?00?0-0000???????????????????????????0?0-??????????00????????????????????????????????????????????????????????????????????????0-???[0 2]????10-[1 2]0?[0 1]?00?20?????00???????[0 1 2]010100100???01??????????3??????2???????1??1?0?1??21???????1???????10??0?????0?…
Augustaburiania_vatagini	??????????????????????????????????????????????????????????????????????????????????????????????????????????????????????-??????????????????????????????????????????????????????????????????????????????????????????????????????????????????????????????????????????????????????????????????????????????????????????????1001?1111000--???11112210010111?110-?????1??000???0?01?-??????????????????????????????????…
Protanystropheus_antiquus	??????????????????????????????????????????????????????????????????????????????????????????????????????????????????????-??????????????????????????????????????????????????????????????????????????????????????????????????????????????????????????????????????????????????????????????????????????????????????????????1?01???????0?????1???[2 3][1 2]10010?10?1?0???????????????????????????????????????????????…
Trachelosaurus_fischeri	?????????00???????????????1[2 3 4][0 1]0???20??????[0 1]0???????????????????????????????????????????????????????????????????????????-???????????????????????????????????????????????????????????????????????????????????????????????????????????????????????????????????????????????????????????????????????????????????[0 1 2]??????????10010?111?01003??[0 1]???1210?00?10??10-01?01??000??100?011-10[1 2]???…
Tanystropheus_spp	0-000-0200010-0[0 1]1001?00000120000?[0 1]020000010??00-0--00---11101--000-3001000310001-0-010--0000100-0002?000-0001000111000-01110[0 1]01000[0 1]0001000-1001-----00------??11-0-0[0 2]1000?2-10011000?0?0002[0 1]1010005-2-010200??1010101?00??0?00?00??01?10?????????0?1?000?11??10-?0-000-?002000010-0-10000120000000010?01110[0 1]1[0 1][0 1 2]0010[0 1]1100101111000--3?0111132100101110111-11?212?20000…
Tanystropheus_haasi	??????????????????????????????????????????????????????????????????????????????????????????????????????????????????????-??????????????????????????????????????????????????????????????????????????????????????????????????????????????????????????????????????????????????????????????????????????????????????????????1?0????????0?????????????01?1?????1???????????????????????????????????????????????????????…
Raibliania_calligarisi	??????????????????????????????????????????????????????????????????????????????????????????????????????????????????????-?????????????????????????????????????????????????????????????????????????????????????????????????????????????????????????????????????????????????????????????????????????????????????????[1 2]????1?0??1111?00--????????????1??1????1-?1????[2 3]000??[0 1]??0011-10[1 2]?00???1???????[…
Langobardisaurus_pandolfii	?100?????0??0-?010?[0 1][0 1]?00011?00??0??[1 2]0??0?5--?00-?--0?--?1????--????01010001???????-010--???000?-??0??????????00??1????-??[0 1]??00?0????00???????????????????????????????????????0???????0??????????????????????????????????????????????????????????????????????????????20-??[1 2]20????????110[0 1]??20??00?????????0[0 1 2]11020[0 1]??1??001??????00--2??????2?10????1???10-11?11??????1??00???-…
Tanytrachelos_ahynis	???00-[0 1]0????0-?0?0????0?????0??????[1 2]??????????0-?-???--?1????--00??0??100?[3 4 5]?0????0-01?--???0100-0012?000?00????0?10000-??01000[1 2]0??00?0??0?????????????????????00-??[0 1]2????????0?1?????????0[0 1 2]0?????????????2????????0??????????????????????????????????????????????????0-???2???0??????000??[1 2]??????0???????10010200000?1001??????00--3??[1 2]1?1[0 1]?10?1??10?210-11?11??0??-01?…
Jesairosaurus_lehmani	0?000-00????0-?000[1 2 3]1?000?01?0????????????100?00-?-?10--?1000?--00??00010003???????-010--??00001-00-20000-00????01101-0-??0000020-1100?1000-0000000000?????????01-0-00?000?2-10?12?00?0?????00??0?03--00102?????0?0??11??????????0??1??1???0?0?0????????????????????000-00?210?010-0-???00020000??001??????[0 1]01010???01?00??10?0?00--2??[1 2]0000????00?1????0-?????200[0 1]000???[0 1]001-10[0 1]00???…
UFRGS_PV_492_T	??????????????????????????????????????????????????????????????????????????????????????????????????????????????????????-??????????????????????????????????????????????????????????????????????????????????????????????????????????????????????????????????????????????????????????????????????????????????????????????1?01?????????????1???[1 2]210??0??1???????????????????????????????????????????????????????…
Elessaurus_gondwanoccidens	??????????????????????????????????????????????????????????????????????????????????????????????????????????????????????-??????????????????????????????????????????????????????????????????????????????????????????????????????????????????????????????????????????????????????????????????????????????????????????????1????????????????????????????????????????????????????????????0?111?10?????????????????????…
Pamelaria_dolichotrachela	1?000-0110??0-0[0 1]10[0 1]???[0 1]??01??0???0-20??0?20??00-?-???---111??--00??0??10003??????0-010--??00000-001?0?00-0000010?00?0?-0000000001?100010????00??????11??????2-0?-????101002-10?120011110000011?0??1?-?0??????0?0100011?0?0100?10011110000?11?11000010000???0?1?????020-0012110010-0-01000?110???0?01?00???10?0211000?100101111010--200100?12100000100110-?1??1100[0 1]0111101001-00100011010??0002?…
Azendohsaurus_madagaskarensis	1?000-0110010-01101120000011000010-200000200?00-0--10---11[0 1]00--100-00010002?000?-0-01?----00000-00120000-00??010110002-??00000001110001000?0?000000011000-01??0000-02111002-10?12001011000201111?02-1001010000101010011000100010111010000?112113-??10?0??1?0?11??10000-0022001010-0-10000?1??01?10010?01111010221001?100101111020--2010001[0 1]11001?0100110211?[1 2]110000101101001?10000000-1010000[0 2]1…
Azendohsaurus_laaroussii	1???????10??0-????????0?????0???1??2????0????0???-?10--?1110?--??0-000?000[2 3]???????????????????????????????????????????-????????????????????????????????????????????????????????????????????????????????????????????????????????????????????????????????????????????00???0220010??????000??????????????????1010221001???????????????????????????????????????????????????????????????????????????????????????…
Shringasaurus_indicus	1?0?0-0110010-?????1?0???011[0 1]10010-2000?1200?0???-??0--?1????--????[0 2]???000[2 3]?00?0-0-010--???????-??????????0??000100000-00000??????????????????0??????1????????0010-??11?0?????0120?1011?002?1???????????????????????????????[0 1]?1?111?10001?110113-?0?0000????????????20-??????1????0-??00??????????????????1??0221000?100101111020--???10??011001001005001?1??1100001111010014?0000010-1??00002?…
Malerisaurus_robinsonae	1??0????10????0?[0 1]??????????2?00000-[1 2]0000?10?????????0??-???????????????00????????0????????????????????????0??0??1?????-??????????????????????????????1?????????????????????????13????00????01????????0????????????001?10??10101?110?10000?1???13-00?00??????????????2?????[0 2]0?0?1??????00????0?????????????10??0?1000?1001?10000?110[2 3]??1???12100100100210-1????1[0 1]00000100[0 1]001-1?1?00???1…
Malerisaurus_langstoni	???0??????????????????????????????????????????????????????????????????????????????????????????????????????????????????-????????????????????????????????????????????????????????????????????0?????041-101?2????????????????????1?110?1?000?010113-??100???????1???????0-0??????????????????10?10???????0??????????????1?01??0000???????1???12100100?00????1?????1000??1?00001?1?[1 2]???????0???00????0??1??????…
Malerisaurus_all_NA	1??0????10010-0????????00?11000000-200[0 1 2]?1200?0???--10---1100?--??0-000?000[2 3 4 5]???????-???--???????-??????????0???10???0?0-??[0 1]?0??????????????????????????????????0????2-??????????1?0?1?11????0?????041-101?[1 2]????????????????????1?110?10000?010113-??[0 1]00?0?1???11????020-0?[0 1]000101?????000??1[0 1]?10110??1?0???1010021000?1?01?100002110??01?0?[0 1]2100100100210[2 3]1???1?10000?…
Trilophosaurus_buettneri	0?000-0200010-0[0 1]010?21001-1200010202000?150-000-0-010---10101--10??01010002?1000-0-010--???0001-00-?0?-?--001010110000-??01000201?00001010-1001-----11?-?-??2-00-0-??101002-10012001?100???1-1???1----0??????1?0101001?030100010111110000?1101000??1?000?11????????220-102200?0?????110001111000100?0?01111010202000?100100011000--2?11000021001?1100[3 4 5]10-01??11[0 1]200011000001-00100000-10100001200…
Spinosuchus_caseanus	0?000-01????0-?001???10???????????????????????0-?-??0--??0???--????0??[0 1]0002??????0-0?0--???0001-00-???-?--0?00?0?00??0-???100000??000010?0-?00???-??11?-??????0?00-2-10??????0????0????????????????????????????????????????????????????????????????????????????????220-?022???0??????1000?????0??0????????10?0202000?100101111000--2?11???021001?1100??0??1???1[0 1]000011?0?001-?010?0?0-?0??300????0?????…
Teraterpeton_hrynewichorum	??000-0000010-00010[1 2]20000-141??002010000?5--??0-?--10---1010?--00??0101000310000-0-0?1--??10000-00-100-0--010010110100-??00000201000?01010-?00001-0011-----12-01-????101??2-10011001?0???0?01???????????????0??0101011?0?????0?????010????0??????001?????????1???0?00?????2?0??1????1100??10??0?10?10????01010200001?1?00??????00--???00?10200?1?010?400-11??1???????1?00???-10[0 1]10?00-0?30????[0 1]??[0…
Arctosaurus_osborni	??????????????????????????????????????????????????????????????????????????????????????????????????????????????????????-??????????????????????????????????????????????????????????????????????????????????????????????????????????????????????????????????????????????????????????????????????????????????????????????1?01?????????????1??????01111?0???0???????????????????????????????????????????????????????…
Eifelosaurus_triadicus	??????????????????????????????????????????????????????????????????????????????????????????????????????????????????????-?????????????????????????????????????????????????????????????????????????????????????????????????????????????????????????????????????????????????????????????????????????????????????????????????????????????????????????????????????????0???01???????1010001111?[1 2]0????0????????????…
Noteosuchus_colletti	??????????????????????????????????????????????????????????????????????????????????????????????????????????????????????-??????????????????????????????????????????????????????????????????????????????????????????????????????????????????????????????????????????????????????????????????????????????????????????????1?0???????0???????????????????????????????0000??1???001?0?[0 1]000111?0200?0?0????????????…
Mesosuchus_browni	0100100110210-01101010002011110010-200310400000-0-010---10001--00100101010-00000-0-010--0100000-01020000-0000000110001-??10101001000101000000000010001000-02001010-00101002-100120000000011000000000000112010120100011110010?010110110100?0101000001010001???11000-000-00?000?01????002100210110010100?1101010-00010?1001?0000000--2?010010110010?100500-1???110000?01??1001-0010001101020[2 3]??00000[0 1]0111…
Howesia_browni	0?00100210?????[0 1]10[0 1]??00????????????????1????????????????1???1??00??1??1111-?0100?0?010????00000?010?0000-00000001000-1-001010?00-000?01000?00000000?0???????0?10-0-1??0?0?2-1?0120?0?0?0???000?0[0 1]001000102010020100?1?11??1??0???101???00?0?0?000??1?000?????????0-?[0 1]0-???????????????21??21??0?01??0?????10?0-00010?1?0?????????????0[1 2]001?????????????????????0?00??1??1????0??000?101??0[…
Eohyosaurus_wolvaardti	??00??02???????110[0 1]???????????????????????????12???????????????0???1??1111-??????????????100000?01120000-0??????????-?-00[0 1]??0100-100101000000000011001001002001?-????1?1?02-1??12000000?0?201??0??[0 2 5]???0????????0?0??11?????????????1??????0????00?????[0 1]0????????????00-???1????10-[1 2]0???10021010?1101???1??1???-000101????????????????????????????????????????????????????????????????????…
Rhynchosaurus_articeps	0100100210210-00200010-12-1-2-0000-20032?5--?0121-010---10001--00??1101111-10100-0-010--0100100-00121000-00000000000-2-??1000100-1001010000100000000010010020110-0-2-100002-1001?00000000?3??0?000----0102??1121??00111????????0?1?1??0???01??000???0000???0?1?????120-?0-100?0?????0112002?0?000101000??01010-000101100??0000000--2??????0?10?00?10040?-11???1?000?0100000?-1??00011110?0[0 1]0?0010[0 1]00011…
Bentonyx_sidensis	0?000-0210210-00200010-12-1-2-0000-20032?5--?0101-010---1000?--00??1?01111-10100-0-010--01?1000-001?1?????0000000000-2-??1010100-100101000?10?00????0???????1110-0-2-100002-1001?000???00131-0?000----01?2?????1???0111?[0 2]0????1?110110000?010?1??????100???????????120-?0-100?01?????1?2????0?????????????1?1?-00010???????????????????????????????????????????????????????????????????????????????????????…
Mesodapedon_kuttyi	0??0???????????????????????????????????????????????????????????0???1???112-???????????????????????????????????????????-???????????????????????????????????????????????????????????????????????????????????????????????????????????????????????????????????????????????????1??10???????22??????????????????1010-00010???????????????????????????????????????????????????????????????????????????????????????????…
Ammorhynchus_navajoi	0??0????????0-0????????????????????2?????????0???-?00---1000?--??0-110?112-???????-???--??????????????????????????????-????????????????????????????????????????????????????????????????????????????????????????????????????????????????????????????????????????????????????????????????2??????????????????1010-00010???????????????????????????????????????????????????????????????????????????????????????????…
Stenaulorhynchus_stockleyi	0?000-0210210-00200010-12-1-2-0000-2003205--?0121-010---10001--00??1?01112-101?0-0-010--???1100-00111000-00000000000-2-??1000100-100101000010000000001?0?102??10-0-2-100002-1001?000??000?3000?01042-10112?????1?110111040100?1?110110000?010?000???0000???0?11????120-00-100?01??0-0122002101000101??0??01010-00010?100100000010--20010010110?1??100200-11???00000001000001-1?100011110[2 3]????0?1000001100?0…
Brasinorhynchus_mariantensis	0?000-0210210-022000[1 2]?-12-1-2?0000-20032?????0120-01?---1[0 1]001--000-1101112-10100-0-010--??01000-001?1??0-?0000000000-0-??1110100-1001010100?00000100010010021110-0-2-100002-100120000000013000?0?042-10102?111?1?1101110?0?0??1?112110000?01?????00????????????????1?????-1001010-0-?122????0?????????????1010-00010?1?0????????????0??0???110???0?0??00???????????????????????????????????????????????…
CRILAR_Pv_461	0?????????????????????????????????????????????????????????????????????????????????????????????????????????????????????-??????????????????????????????????????????????????????????????????????????????????????????????????????????????????????????????????????????????????????????????[0 1]22??????????????????1?????0?1????????????????????????????????????????????????????????????????????????????????????????…
CRILAR_Pv_462	??????????????????????????????????????????????????????????????????????????????????????????????????????????????????????-??????????????????????????????????????????????????????????????????????????????????????????????????????????????????????????????????????????????????????????????[0 1]2???????????????????1?????0?1??????????????????????????????????????????????????1??0??????????????????????????????????…
Elorhynchus_carrolli	0????????????????????????-??2-????????3??5--??????????????????????????????????????????????????????????????????????????-????????????????????????????????????????????????????????????????????????????????????????????????????????????????????????????????????????????1?????-1??10??????122??????????????????1?????0?1??1??????????????????????????????????????????????????????????????1?1?[1 2 3]1???????????????…
CRILAR_Pv_497	0??????????????????????????????????????????????????????????????0???1???11[1 2]-???????????????????????????????????????????-??????????????????????????????????????????????????????????????????????????????????????????????????????????????????????????????????????????????????????????????[0 1]22??????????????????1?????0?10???????????????????????????????????????????????????????????????????????????????????…
Chanares_rhynchosaur	0????????????????????????-??2-????????3??5--???????????????????0???1???11[1 2]-???????????????????????????????????????????-????????????????????????????????????????????????????????????????????????????????????????????????????????????????????????????????????????????1?????-1??10??????122??????????????????1?????0?10?1???????????????????????????????????????????????1??0???????????1?1?[1 2 3]1???????????…
Langeronyx_brodiei	0?000-0?1???0-0020???0-12-1-2-0000-2003205--?01[0 2]?-010---10001--00??1?01111-?0???-?-010--01?1000-001?1????????000?000?0-001?001?0??0010?????????????????????????0??????????????????????????????????????????0??12????????????????????????????????????????????????????1????0-10010??????1?2?????????????????01010-00010???????????????????????????????????????????????????????????????????????????????????????…
Fodonyx_spenceri	0??0????????????20????????????????????????????10???10??????????000-1101111-????????????????100??00?11000-0????????????-???????0??1????10000?00000000?1????00???????????????????12000000????1-0??00----011201112????????????????????????????????????????????????????120-00?100101????01120?2001000101??????1010-00010???????????????????????????????????????????????????????????????????????????????????????????…
Isalorhynchus_genovefae	0?000-??10??0-0010?0???12-1-2-???0-2?03[1 2]?5--?011?-01?---10101--00??1?00110-?0?????-010--0001000-1012100021000??0000??0-??1?00100?1001010?00??0000100?1002002??1??????10??????0?1?000??1???31-1?0?1----0112??????1???111?????0?1?110010000?1?0?000?????0????????????120-00-1001010-0-01020121010??00?0????01010-00010?100?00000?00--??01????????1???????0?1100??1?00?01?0100??101?00?1010[1 2]00?0001?000011…
Hyperodapedon_sanjuanensis	0?00????102?0-0??0?0???12-1-2-00?0-200??05--00111-0??---10001--000-1100110-???????-01?--1101000-10?2100120????????????-???????????????????????00?????1002002???????????????????1????00000131-11011----011201112???1?1[0 1]?0???01???110110000?1101000???0?00??1????????120-00-1011010-[1 2]01102001000001001?00??01010-00010?1000?1101????????0???0?000?0??0??????1?2?00000?01?000?1?101??????1???????01?0000?1…
Hyperodapedon_mariensis	0?000-1210210-00100020-12-1-2-0000-2003205--00111-01?---10001--000-1100110-[0 1]0100-0-010--1101000-[0 1]0121011210010001002-1-001100100-100100000010-000000010020021110-0-2-100002-100110000010??31-1[0 1]0?1----01120101201010111040-00110110110000?1101000???000000?001110??120-00-10[0 1]1010-??01020?2100?01001000??01010-00010?100??????????????????????????????????????0?0000??000?0????????????????????…
Hyperodapedon_huenei	0?000-1210210-00100020-12-1-2-0000-2003205--?0111-01?---10001--000-1100111-00100-0-010--??01000-00121010210000001002-0-000100120-0001010000000001100010020012-11-0-2-100002-1001200000100131-1[0 1]0?1----01020101211010111040-01?1?110110000?110?0?????0000???0???????1?0-0?-101?0???0-11120021000010?0000??01010-00010???????????????????????????????????????????????????????????????????????????????????????…
PVSJ_2728	0??????????????????????????????????????????????????????????????????????110-???????????????????????????????????????????-???????????????????????????????????????????????????????????????????????????????????????????????????????????????????????????????????????????????????????????????????????????????????1010-00010???????????????????????????????????????????????????????????????????????????????????????????…
Hyperodapedon_gordoni	01000-02102?0-00100020-12-1-2-0000-2003205--?0111-010---10001--000-1100110-00100-0-010--0101000-10121000200010000000-0-001100100-00?101000100-000000010020022-10-0-2-100002-1001201000000131-11011----011201012110?011104000101?1100100000110?000???00001?10011??0-120-00-10?1010-[1 2]011020-2000011001000??01010-000101100000000000--2?01000?????????0?[0 1 2]??-11?0000[1 2]00?01000001-10100010-00?000?0011…
Hyperodapedon_huxleyi	0100000210210-00100020-1?-1-2-0000-200?205--?0111-?00---10001--000-1000110-00100-0-010--0101000-10111001210010000000-0-0?1100100-000101001000-000100010020022-10-0-2-100002-1001200000000131-1[0 1]011----0102011121101011104?-0101?110010000?110?000????000???0?11??0-120-00-1011010-0-1102002[0 1]10001001000??01010-00010?100000000000--210000101000000?000??-110?000000001000001-10110011000?00????10000011…
Teyumbaita_sulcognathus	0?00000210210-00100020-12-1-2-0000-2003205--00111-010---10000--000-1100111-10100-0-010--0101000-10121010200000000000-0-001100110-000101000000-000000010020012-10-0-2-100002-1001200000100131-1[0 1]011-----112010121101011104000001?110110000?110?001001?000???1?01??0-120-00-1011010-0-1122002[0 1]00001001000???1010-0?010?100000000000--?101001?100010000011??1????000000?1000?01?1?????????0???00?[0 1]1010…
Eorasaurus_olsoni	??????????????????????????????????????????????????????????????????????????????????????????????????????????????????????-??????????????????????????????????????????????????????????????????????????????????????????????????????????????????????????????????????????????????????????????????????????????????????????????1001?11100????????????1?000[0 1]?11???0?011??1?????1??????????[0 1]???????????????????????…
Prolacertoides_jimusarensis	0??0??0?00?10-???????00????????????????0?????00-?-???--?10000--0???2?010003?00?0?0-010--???0000-??????????00100???????-?????????????????????????????????????????????????????????????????0?31-0?0?0????01??000?????????????????????????????????????????????????????????????????????????????????????????????[0 1]???2000?????????????????????????????????????????????????????????????????????????????????????????…
Prolacerta_broomi	01000-0[1 2]00010-0[0 1]10111001201210?00[2 3]0210001100000-?-010---100?0--000-000100041000?-0-010--0000100-010200[0 1]0-0000000110100-0010000000100001010000000000001000-011101[0 1]0-[0 1 2]0101002-1001[1 2]00001101000001100000011010110201000111000110000010110[0 1]000002100010101000110011000-000-0000100010-0-000000210001110100011110100010001100111010021102001101121000[0 1][0 1]101[1 2]103011[1 2]…
K_australiensis_combined	???00-?1????0-???01???????????????????????????0-?-???--?1000?--0???[0 3]??[0 1]00????????0-???--???????-??????????00???0???100-??[0 1]00?00?0?????101000?0000[0 1]00?1000-01[0 1]?0111000101002-1?????0???????????????????????????????0???10????????0?????????0?2?000????100????????????????????????????????0?2??0??1?????????????0????????????????????????????????????????????????????????????????????????????…
Boreopricea_funerea	??000-0?????0-?0?0[0 1]??00????????????2???011???00-?-??0---1000?--00??0??100?[3 4]?0????0-010--??-??00-0?-1------0000000100?0-0?000?000??000010????00???????1000-?1???????1010?0?2-10?12000?10?1?[0 1 2]0???1??????1????????????????????????????????????????00??????????????????000-00?200??????????00????0????01???????01000?0?0?1001?1000020--???????0210010010?200[1 2]1???11?00000100100?[2 3 4]??[0 1]???…
Teyujagua_paradoxa	0?000-0010110-0110111011?012100000-200001200?00-1-?00---11001--000-0001000310000-0-010--0000100-00020000-00000000000-0-??1000100-000001000100000010000------1100-0-11101102-10012000010???2000?100012?1??2?????010??1?1?????????????????????????????????????????????011?00000?010-0-00000021?10?1001?00??11010011000?1?01???????0??????0010?10?01?100610?1??1??????????????????????????????????????????????????…
Antarctanax_shackletoni	??????????????????????????????????????????????????????????????????????????????????????????????????????????????????????-??????????????????????????????????????????????????????????????????????????????????????????????????????????????????????????????????????????????????????????????????????????????????????????????100??1011010--????????1??0???10????-?1???1?01001??01001-?0[0 1]???????????????????????????…
Archosaurus_rossicus_holotype	????????00?1???????????????220010[2 3]1201??1101??????????????????????????????????????????????????????????????????????????-???????????????????????????????????????????????????????????????????????????????????????????????????????????????????????????????????????????????????????????????????????????????????1????????????????????????????????????????????????????????????????????????????????????????????????…
Archosaurus_complete	1???0-0100?1???????????????220010[2 3]1201??1101???????????????????????????????????????????????????????????????????00?0000-00?????????????????????????????????????0001???10?00?????????????????????????????????????????????????????????????????????????????????????????0????0[0 1]11000??????00[0 1]??????????????????1????21000?1?01?????????????1???0[1 2]111010?0???0???????????????????????????????????????…
Proterosuchus_fergusi	[0 1]?000-01000110021021110121122001031201001101000-010100--110000200100000000420000-0-0101100001000000301100[0 1]000000000000-??100010001000010101000000100010[0 1][0 1]-02110[0 1][0 1]11[1 2]010100011001200001001??0001100000010010110200001111000101?00010110101?01210000010101?111?11?01?0010001110?01110-00000111010110010101111010011000110011100[0 1]020--200[0 1]0010110[0 1]0[1 2]0100300201?210?010…
Proterosuchus_goweri	[0 1]?000-010001100210[2 3]1[0 1]00121122?010[2 3]1??1?01101000-010?00--11?0002001021000004?00???0-01011000??0??00130?10??0000000?0000-00100?1000??00010?01???000?0001????????000111010100011??130000100112000?1000[0 1]?01???01?0201001111030101?0?010110101?01210000010101???1?110?10????????????????????????????????????11?1?????1??0???????????????????????????????????????????????????????????????????????…
Proterosuchus_alexanderi	?1001001?0??1002102??[0 1]01????2??????????0??????0-?1?????-11?00?20???0?0?0004[1 2]0????0?0?0?????01000???30110-0000000000000-??10001000100?01010100000010001000-0211000112-101000110?1300001001??00????000001001?11?201001111000101?0?010110101?0?2?0??????101???1?11??10001000011?001110-00000111000?10??010??1[0 1]010011000110011?000020--2?000010110?010100[3 4]001011210??1?011?010014?0?000111101001?10…
FC_DPV_2641	??????????????????????????????????????????????????????????????????????????????????????????????????????????????????????-??????????????????????????????????????????????????????????????????????????????????????????????????????????10?10101??????????????????????????????????????????????????????????????????????????????????????????????????????????????????????????????????????????????????????????????????????…
'Chasmatosaurus'_yuani	1?000-010001100210?11001?11[2 3]2001031201001101?00-011000--110000200100100000420000-0-01011??00100000130110-1000000000000-??1000100010000101010??00020001000-02???000-2-1010?[0 1]110?130?001??1?2000?1?0[0 2]?0??001?11?2?????111?30??1?0??11110000?0?210??????001???????????001?001110001110-?000011102?110010????11010011000?100??1000120--???[1 2]?????????0?1???0?[0 1]???[1 2]?100[0 1]0??1?0[1 2]001310…
UFSM_11444	??????????????????????????????????????????????????????????????????????????????????????????????????????????????????????-????????????????????????????????????????????????????????????????????????????????????????????????????????????????????????????????????????????????????????????????????????????????????????????????????????????????????????????????????????????????????????????????????????????????????????…
UFSM_11394	??????????????????????????????????????????????????????????????????????????????????????????????????????????????????????-??????????????????????????????????????????????????????????????????????????????????????????????????????????????????????????????????????????????????????????????????????????????????????????????1?0??111100?00???????????????????????????1??101??00?01????[0 1]???????????????????????????…
Tasmaniosaurus_triassicus	0?0?????????100???????????1?10?????20????10??????[1 2]?????-110??0100??0???000[3 4]???????????1????????????????????????0?1?0??-00?????????????????????????????????????0????2-?0???[0 1]1??????????????????????????1????????????????????????????????????????????????????????????0????0?0??0011?0-?000?????????????????110?00[1 2]10?0?100??1010????????????????????????????????1??1??????10???????????????????1[…
Vonhuenia_fredericki	??????????????????????????????????????????????????????????????????????????????????????????????????????????????????????-??????????????????????????????????????????????????????????????????????????????????????????????????????????????????????????????????????????????????????????????????????????????????????????????10011101101??????????????0?1?1?????-?????????????????0????????????????????????????????????…
C_rossicus_combined	??????????????????????????????????????????????????????????????????????????????????????????????????????????????????????-??????????????????????????????????????????????????????????????????????????????????????????????????????????????????????????????????????????????????????????????????????????????????????????????10011111102100???1???0111[0 1]02010?[5 6]1010?????0010??1001?0????????????????????????????…
C_magnus_combined	??????????????????????????????????????????????????????????????????????????????????????????????????????????????????????-??????????????????????????????????????????????????????????????????????????????????????????????????????????????????????????????????????????????????????????????????????????????????????????????1?01?11111?100???1???0111[0 1]02010?410???????????????????????????????????????????????????…
Chasmatosuchus_vjushkovi	[0 1]????????00????????????????220010[2 3]0201??110???????????????????????????????????????????????????????????????????????????-???????????????????????????????????????????????????????????????????????????????????????????????????????????????????????????????????????????????????????????????????????????????????1????[1 2]1??????????????????????????????????????????????????????????????????????????????????…
Koilamasuchus_gonzalezdiazi	??????????????????????????????????????????????????????????????????????????????????????????????????????????????????????-???????????????????????????????????????????????????????????????????????????????????????????????????????????????????????????????????????????????????????????????????????????????????????????????????????????????????????????????????1??????20???????0????????????????????????????????????…
Kalisuchus_rewanensis_holotype	2?00????????10??????????????2??????[1 2]?????????0???[0 1]?000-?1[1 2]???0???10000?000[3 4 5]???????-???????????????????????????????????-???????????????????????????????????????????????????????????????????????????????????????????????????????????????????????????????????????????????????????????????????????????????????1???0210?0?????????????????????????????????????????????????????????????????????????…
NMQR_3570	????????????10???????????????????????????????0?????100-?1200?02????0?0?00?????????????????????????????????????????????-???????????????????????????????????????????????????????????????????????????????????????????????????????????????????????????????????????????????????????????????????????????????????1?1?0?1000???????????????????????????????????????????????????????????????????????????????????????????…
Fugusuchus_hejiapanensis	??000-00?0??100210[2 3]1?10????????????????0?????00-?[1 2]??00--110000200??0?010003?0?0?-000?011??00000010020011??00000?200?-0-??100010101000010?01??00001000???????????-0-2-1010?011?????0??????????01???????????????200011111100-01100?11110001?01111001010101??1??110??????????????????????????????????????????10100?10?0?????????????????0?????????????????????????????????????????????????????????????????…
Sarmatosuchus_otschevi	2?000-0?0001?????0[2 3]???????1220010[2 3]0201??110???????????????????????????0???[2 3]?????????????????00??00?[2 3]0??1???????0??0???-00?????0???????10?01?00000[1 2]0001???????????????1?1???????12000110????0001??00?000002?????0?0111?1000-01?00111110000?1111000?0?0000??1??110???0[0 1]???0211001??????000??????????????????10???21000?100111011110--[2 3]??1001011000[0 1]0100200-01????000101110?00?-??…
Guchengosuchus_shiguaiensis	??001000?00?101???[2 3]??1[0 1]????????????2??20?????1??010010-011-??020?100?1[0 1]0002?0000000?1??????????????????????????0??00-0-00[0 1]?0????-?????????????????????????????00-0-2-10110[0 1]?1??????????????1-0???0----00?2?????0?1?11?10??-?????????????????????????????0??1?1100???????????????????????0?1??20?????0?1???1010021000?10011?111??100???1????[1 2]10001010??10-?11[1 2]1????????10200?-?0[0 1…
CRILAR_Pv_499	??????????????????????????????????????????????????????????????????????????????????????????????????????????????????????-??????????????????????????????????????????????????????????????????????????????????????????????????????????????????????????????????????????????????????????????????????????????????????????????1??????????????????????????????????????????????????????????????101????????????????????????…
Cuyosuchus_huenei	???0?????????????0??????????????????????????????????????????????????????????????????????????????10?30??0??????????????-??????????????????????????????????????????????????????????????????????????????????????????????????????????????????????????????????????????????????????????????????????????????????????????????100111111010--????????1?0001?10???0-?1???10010011?01001-??[0 1]0?01111?10[0 1]0??[0 1]1?1?…
Garjainia_prima	2?000001000110021021210120111010020200201100120-011011--1200?1300100111000220000100010011-0201011002001000000100001000-1-100010101000110001000000100010020122-00111??101102-100120000010???[0 1]00[0 1]?[0 1]0022000020111200011111130-010001101100001111100000?0101021111100110010002100011101000000111030000010?1??11010021000?100111111120--2?0200101101010110[3 4]001011[1 2]1[0 1]0010111101001200000011?1…
Garjainia_madiba_combined	2?00??[0 1]100011???10???????01210100[2 3]020[0 1]??1100????????1[2 3]??1[1 2]???????100?1?000[2 3]??0?????0??????0?????1002001000???10???????-??10001?10?0001???????????[0 1]???100[2 3]002????1????1?111??1????0?0?11????????????????????????0?0??1?1130-?1100010?1000011111000?0?0101????111?0??0????021000[0 1]??????0000?11?[2 3]??1?01?11???10?0021000?100111010010--???[1 2]???0110????11????-?1???00?10…
Erythrosuchus_africanus	2?000-00000111021021110010111000120200201100?20-0100120-12000020011311200021000000101001??0201011002001[0 1]010001000000-0-1-1000101-1000010000000000210010020122-00-112-1011111100120001000???1-0?000----00020?10200011111041-0211011111000011?1100001?000002011111011001100?00001110100000011103001001011??11010021000?110111111010--20?2???01101010100?00-0111100210011102001-00[0 1]00010-00?0?00[0 1]01110…
Shansisuchus_shansisuchus	2?000-00000110121031210??0111000120210201100?20-01101[2 3]0112-00110011211000022000010101000??0[1 2]000?10020010010000001000-0-1-1000101-?000110?00?000002100100[2 3]012??00-102-101001110012?00?10????1-0???0----01?2?????001111?1041-?2110?11110?00?11?1?0??1?0?00?2011111?11001?0020000111010?0000?110300?0010?????1010[0 1]21000?1101?11?1?10--????0010?10?00?10?20?-?1?2?00[2 3]1011100?001-00[0 1]?00?0-0…
Shansisuchus_kuyeheensis	???????????????????????120?110001?0??????10???????10???????????????[0 1 3]?1?00?????????????????????????????????????????????-????????????????????????????????????????????????????????????????????????????????????????????????????????????????????????????????????????????????????00?1??????000??????????????????[0 1 2]????????0?1?0??11??????????[1 2]???0110?????0??????????0???00?1?0???1???0???????????????…
Chalishevia_cothurnata	2?000-???00?101???????[0 1]1[1 2]??????????21?20?????2??0?101[2 3]?112-??12??10211?0002??00010??1?????????????????????????????????-??????????????????????????????1?????2??????????????????01?0?0010???????????????????????????????????????????????????????????????????????????????????????????????????????????????????1???021000???????????????????????????????????????????????????????????????????????????????…
Bharitalasuchus_tapani	2???????????????????????????????????????1[0 1 2 3]0?????????1??????????????????00?????????????????????????????????????????????-????????????????????????????????????????????????????????????????????????????????????????????????????????????????????????????????????????????[0 2]???????0?0???????000??????????????????1????21??0?1101?11??0????2??10010110?????0?????01??10?2100??10???????0?????????????????[0…
Youngosuchus_sinensis	??000-010001100210[1 2 3]111000001100002011000?200?00-01-012--111000200??001100?220011-0001002??0101011002001000000000101000-??100010110001010000010000100010020022-?010-2-101102-10012000001???????????????????0???20?1??111????????????1???????????????????????????????0010?0200??11????000001110200000??????1[0 1 2]010021000?10011??11?00??2???00?0110?0101??400-1112??????????????????????????????????111[…
Uralosaurus_combined	2?????????????????????????????????????????????????????????????????????????2???????????????????????????????????????????-????????????????????????????????????????????????????????????????????1-0???0----0002?????????????????????????????????????????????????????????0????0210001??????000??????????????????1????21??????????????????????????????????????????????????????????????????????????????????????????????…
Vancleavea_campi	2100100-00110-0100101?110011000103020000?1???00-0--00---11001--0-1?010000?200000-0------??00000-01020000?0000000-?02-0-??2--0100--000010-01110000000-10020022-00-0-??00?002-1011001000?????????????????????????0?1??111???100??0010110000??????????????????1??1??1?00???03200?010-[1 2]10000001100???001?????11011-21000?1?0????00?00--???1????1???10?10???0-1????1?3100?100[0 1]00?-??[0 1]?00????????00?21110…
Litorosuchus_somnii	?1000-?100111001101201010111110103120?00?40??00-01-0010-110000000??300?0??220000-0?01?????0100010003???0??0000001112?0-??2--01???01??0????????????????????????0????2-10???2-??01???0???????00?????012?????????????1?1???40-0?0?0?1????00??011000000?1?00?????111????010??0000?1110?000000?2?0201100?0????11011-[0 1]1000??00101111?00--2??[0 1]0??[0 1]110?1[0 1]?110100-11?2110?100??00[0 1]011-10??00????0?0?…
Asperoris_mnyama	2?002001?0011?0?1????1[0 1]0001100000[1 2 3]0200201200?0????-01[0 1]?-110??0??011[0 3]00?000[2 3 4 5]?00?000?01?????????????0???????00?000[0 1]002-0-00??0????-?????????????????????????????00-0-[1 2]?10?01[0 1]-??????????????????????????????????????????????????????????????????????????????????????????????????????????????????????????????1?????1??0?????????????????????????????????????????????????????…
Euparkeria_capensis	2100[0 1]0010000100110112100[0 2]0110100030200001200100-000[0 1]010-110000200100001000210000000010111-0000000002001000000000110100-??100010000000010000010010000010020022-0100-2-10100011001200000001020011110020001020100201010011040-00000110110000?110100010101000101?11001?0010001100001102?0000002102011101010??110100210001100101111010--20?10000100?010100200-010211[0 1]010001??1001-00000010-10??[0 1]…
Dorosuchus_neoetus	??????????????????????????????????????????????????????????????????????????????????????????????????????????????????????-????????????????????????????????????????????????????????????????????????????????????????0111?1?1040-01?0?111?10000?110?000???00000?1?11100??????????????????????????????????????1?????????????1???????????????????????????????????????????????????????????00???1????????????????????????…
Halazhaisuchus_qiaoensis	??????????????????????????????????????????????????????????????????????????????????????????????????????????????????????-??????????????????????????????????????????????????????????????????????????????????????????????????????????????????????????????????????????????????????????????????????????????????????????????100?01110010--?????????????0?1?????-01???000100?1?0[0 1]011-0?[0 1]???????????????1?100011…
Osmolskina_czatkoviensis	0???????????10???????????????????????????????0?????101??1201????????00?00?????????????????????????????????????????????-????????????????????????????????????????????????????????????????????????????????????????????????????????????????????????????????????????????????????????????????????????????????????????????????????????????????????????????????????????????????????????????????????????????????????????…
Osmolskina_complete	[0 1]?000-[0 1]1?00?10?0?0???1[0 1]00012110003020000120??0???0?101??1201?020?10000?000??????0000[1 2]?1???0??00?00020??0?00?0000110000-00100010000000010100110010000010021022-0100-2-10????????11000000????000???05-0-0102??0?20101?1??040-000??110?10000?1101000?0?0100010??11?0??0???00?10000???[1 2]??000??[1 2]1??01?00101011?10???21000?1?01?1111?10--?0?10000110?0??10?300-?????11?10001002011-??0?00???1…
Polymorphodon_adorfi	2??0????0001100??0???1[0 1]000121101020201[0 1 2]??100?00-?1-1-??-1100?0000[1 2]0200?0002????????0???????0000?00?100?0??????????????-?????0?00??00?0???????????????1?????????????????????????12??0?00??????????0????010??????010??1?10?0?00????10?10?00???0?0????1??00??????????????????0?0?????????00??????????????????1011121000?100???????00--???0???????0?0??1?????????????00???????????????????10?0???????…
Yarasuchus_deccanensis	??????????????????????????????????????????????????????????????????????????????????????????????????????????????????????-??????????????????????????????????????????????????????????????????????????????????????????????????????????????????????????????????????????????????????????????????????????????????????????????10011111100100[2 3]??1???[0 1]2100110100410-?1???10010111001001-1?[0 1]?0010-1???30???1?2?…
Dongusuchus_efremovi	??????????????????????????????????????????????????????????????????????????????????????????????????????????????????????-????????????????????????????????????????????????????????????????????????????????????????????????????????????????????????????????????????????????????????????????????????????????????????????????????????????????????????????????????????????????????????????????????????????????????????…
Teleocrater_rhadinus	2?000-0?????100?0???????0????????????????????????[0 1]?0020-1?0??010021000?0001????????????????????????????????????0?10110-00??????????????????????????????????????????????????????130?0100????????????????????????0?0??1?10???110???10?10000????????????????????1????????????????????????????????????????????1????21????10011111100100??01001?210010010?[4 5]10-1???11001?101101001-1?0?00?0-1010?00????21?011…
Spondylosoma_absconditum	??????????????????????????????????????????????????????????????????????????????????????????????????????????????????????-??????????????????????????????????????????????????????????????????????????????????????????????????????????????????????????????????????????????????????????????????????????????????????????????1?01?111100?????????????0??1?10??10-1????1??100?110???1?1?[0 1]0101??1????????1????011000?…
Proterochampsa_barrionuevoi	231[0 1]20200011100120311010011210010[2 3]021000?100100-?2-0012-110010100110?020002[1 2]000000001000?-0000000002000000000000[0 1]100-0-??2--0100-0000010001000000100010020022-00-0-2-101002-10?1?0?00000102000?01042-10102?101201011111040-0?01?110111001?0?20001??100000????????1?001?00?00[0 1]1?10-110[0 1]000?0-030000000?0???10100[1 2]1000?1000?0000000--2?021000110000?100300-11?[1 2]?1?310?11000001-10…
Proterochampsa_nodosa	2?1120200011100110312010?11?10?1?[2 3]021000?100?00-?????0--110010100??0?0200022000100-01000??000000000?0?00?000000??100-0-?????0100-?000010001?00?00?0?0100[2 3]0022-?0-????10100??1001?00001001?2??0???0????0????????0???1111????????????????????????????????????????????001000?000?????1??0?00?0-031??0000?0???10100?00?0???????????????????????????????????????????????????????????????????????????????????…
Tropidosuchus_romeri	?100202100111[0 1]0010[1 2]100100?1?100103021000?100?00-11-0000-110010100??0?0100?210001-0001010??0000011013000000000000010000-002--01000010101010[0 1]000000100110121022-0000-2-101002-1001[2 3]0000000???00011[0 1]002210102?????0?01?111040-00?1?110111000?0?2?0000?10000?????1?????001100020100??????0?01?20?3???0110?0???[0 1 2]010011000?1001?0000000--200200?0110?00?100210-11???110100?1?00011-10[1 2]0…
Cerritosaurus_binsfeldi	??0020200011110110[1 2 3]11010??1110?1?30210?0?1???00-12?0011-110?10100??000100?2?0001?0001002??000000100200000000000001??-0-??2--0100-010101010??110001001100310?2-0?-0-2-1010???10013000?00????????????????????????0???1111??????????????????????????????????????????????11???2????????????00?11?3???001??????[0 1 2]010[0 1]01000???????????????2???????????000?????0?????????????1??0?0???0????????????????…
Pseudochampsa_ischigualastensis	?2?0212?00111?0[1 2]10[1 2 3]1?0200012100103021000?10??00-12-000--110010100??0101000320001-0-01??0??01000?10?2000000000000010000-??2--010000?0111010?011000100110121022-?0?0-2-10100??1001?00000001??000???002210002????????1?111040-0[0 1]?1?110111000?0?1?000???1000???1?1?????0?1?00??0????????00001?1??3??00110?01?11010001000?1000?1100??0--20?20???110?000100?00?11?2111010?11000001-10??0????1011?00000?…
Rhadinosuchus_gracilis	??0021??00111?0???????2???1?1??1?30????0?[1 2]0??0??11??0[2 3]?-110??0100??0?0?00?3?0001?00?1??2???[0 1]??????????????????????????-??????????????????????????????10?[2 3]1?[1 2]????????????????????????????????????????????????????????1?1?40???0???????????????????????????????1?????0????00211?0??????000?????????????????11??0[0 1]21000?1??????????????????????????????????????[1 2]1?????????????????????…
Gualosuchus_reigi	2?0021210011110210[2 3]1002000121001030210001100?00-11-000--110010300100101000210001-0-01001??01000010[0 1]2000000000000010000-002--01000000111010[0 1]?11000100110121022-0010-2-101002-10012000000010200011?002210102010120?01?1110?0-?0???110111000?0?2?0????1?000???????????0012000201?010-1100001?1003000011000??110100?1000?1001?0000000--20020000110?000100300-11?2?0[0 1]0100?1??0001-10[0 1]???????????…
Chanaresuchus_bonapartei	220021210011100210310020001[2 3]1001030210001100100-1[1 2]-000--110010100100101000310001-0-01002?-0100001002000000000000010[0 2]00-002--010000001[0 1]1010[0 1]011000100110121022-0010-2-101002-100120000000102000[0 1]1[0 1]002210[0 1]020101201011111040-00?10110111000001210000011000???1?1???1?00110002010010-11000011110300[0 1]011000??110100[1 2]1000?100001100000--200200[0 1]0110?000100[3 4]00-11?2?[…
Archeopelta_arborensis	??????????????????????????????????????????????????????????????????????????????????????????????????????????????????????-????????????????????????????????????????????????????????????????????????????????????????0111?1??041-1??1?110?10100?110?000???0001?????110?????????????????????????????????????????????????????1?0???????0??????????????????????????????00000?1????001?1??1??????????????????????????????…
Tarjadia_ruthae	2?0020110001110010[1 2 3]1200020110?00020210201200?00-0100032-110100100210001000010000000010120102000010021010310000100?0000-0?10001?00?00001???01??00110??10?2?????001????10100??1?01?0?0?00????1-11?[0 1]1----0002?1102010?11?1??0?11?1?110110100?1100000??10001???1?111?1?001000?1010011021000001100300?0010?0??-1010021000?100001000001202??2???????00001?0?00-?10??00010111000001-10010010-1?[2 3]02???010…
Pagosvenator_candelariensis	??00???1000111???0312?000011000002021020?2???0??01?0?32?110100100??0?0?00?010?0?00001012???20?00????????00000???0?0?0?-??1??01000000?0???0??1?00???00100??????10?????101????11??????????????????????????????????????11???0???????????????????????????????????????1???1????????????2??????1?0?????0010?????10?00????0???????????????????????????????????????????????????????????????????????????????????????????…
Erpetosuchus_granti	??0020?20001110010?11000?01?01?00?021??0120??00-01?0?30-1101002002?00010000[1 2]0000??001002??02000010?21010110000???10000-?????00000??0001??00?110??????1002002??1000-2-10?00????01???0????11?1-1?0?1----0102??102??????1??????????11?11?00????0?0??????00????????????001[1 2]?0110?00???2100000?20030??00??????-1010000000?1000?100000120???20010100000010?[4 5 6]00-11???1?0???11000001-100???????????????11…
Erpetosuchus_sp	??00????????11??[1 2]0????????????????????????????0-?1?0030?11???010???000200?0????????????2??0200001003101011????????????-?????0?????0000????0???0??????1002002??????????????????????????????????????????????01101??????????????????????????????????????????????????????1?0??????????21???00120?30??0?1011???10100?0000???????????????????????????????????????????????????????????????????????????????????????…
Parringtonia_gracilis	2?002010?0011001?0[1 2]12000001101?00[1 2 3]021?20?2???00-?1-10[2 3]1-1101001012000?10000?000010001?02???20001100?1?????0?00??111?00-001?0000???00?01???0?110?????1100[2 3]00?2-0?-0-2-101002-1?012000?0?????0?????????????2?????01111111?40-2101?110110100?1100100?0?1001?001?11001???1??0?10?00??????000??21????1????1111-10?0020?00?1?0??1000?0120?0?200??1???0????????-1?????1200??1000011-1???00?0-??10000…
Dyoplax_arenaceus	?10?????00011100???1?0??????[0 1]??0?????????????00-?????31-?????0?????????????????????????2????00??1???1?????????????????-00????????????????????????????????????????????????????????????????????????????????????????????????????????????????????????????????????????????1???????????????[0 1]?00?????0??0????????????????????????????????????????????????????????1?11?????????????????????????????????????????…
Jaxtasuchus_salomoni	[0 1]??020??????1????0????[0 1]??????????????????????0???100-1??1100?000010000?0003???????????????????????????????????????????-????????????0?????????????????????????????????????????????????????????0???0????0????????0?11???????-?01??????110??????????????????????????????????????????????????1???????0?1??????10?0001100?1?01??????00??2??[0 1]???1[1 2]10000010?110-???[1 2]?1?[2 3]10?????????-11????????…
Doswellia_kaltenbachi	2?1020[0 1]0????????-13???????????????????????????0-???????????????0??????00004????????0??????11?0??00-00--0--?????0???0-0-??2---100-0-0-0100-1110000-0001----022-00-0-??001002-1??120000000???000???0002101120101201111111020-0011?110011000?010?001??1?000???????????000-?00200001?????0000120001000010001111???0?0????1001?0000000--2???10?01100000110?10-10?[1 2]11[1 2]010012000000-11011110-??3000?1[0 1]…
Rugarhynchos_sixmilensis	2?101?2?000?0--121?11110001110000[1 2 3]0200001100?-0-0--0----11001--00[1 2]130000003?0???0?-010--??-0100-10-001-0?-00101011????-?????100???1?????00-1??1-----01?0???????????????????????13001?00????00??0??00?1???????????????????????????????????????????????????????????????????????????????????????0000?????????10101001?0?1??00????????????2????1???????0?????????????????????????????????????????????????…
Sphodrosaurus_pennsylvanicus	???0??????????????????????????????????????????????????????????????????????????????????????????????????????????????????-????????????????????????????????????????????????????????????????????????????????1?2??????????????????????????????????????????????????????????[0 2]0-???????????????????10??????110?0??????????????10????????????[0 1 2]??2???0?1????????????10?2?102100?[0 1]???????100??????????????0??…
Triopticus_primus	??0?200-????1???[0 1]00?????????????????????????????????????????????????????????????????[0 1]??[1 2]???????????????????????1??0?-0-00????0?0-??????1????100?????0?????????1?-0-0?0????????????1????????????????????????????0?110111040-0[1 2]010112?10000?01011????10?00??????1??1?????????????????????????????????????????????????????????????????????????????????????????????????????????????????????????????…
Parasuchus_angustifrons	??10201001111000001??000001?0??-02--?-001[0 1 2]0?100-1?-0?20-1101002001020020003?0000-0001002??10000110030000110000101???-0-????00100-0101010100111000100010020022-0?-0-2-101002-1011210001001131-12011----01020111201010111040-???1?111110000?0?0?1[1 2]-??1?000?????????1???????????????????????????????????????????????????????????????????????????????????????????????????????????????????????????????????…
Parasuchus_hislopi	2210201001111?00001210000014000-02--0-001000100-12-0020-110100200102002000310000-0001002??10?00?10030000110000100100-0-001010100-0101010100?11000100010020022-00-????101002-1011210001001131-12??????????????12010101110??-1111?1111100100010001-???0001???1011?01?2010?10001?110-2?10000?11010?01010?1??110?1-[0 2]1000?1001011110011[0 1]20010000110000?100?0?-11?2?10010111000001-10000010-1???????00-000011…
Nicrosaurus_kapffi	2?10101002111000001230000012000-02--0-001000?00-11-000--110100200102002000320?10-0-[0 1]1000??100-0000030000110000100100-0-??1000100-1100010000111001000011020022-00-0-[1 2]1111002-1011210000001131-12011----00020111201010111040-01??0111110000?000?0[1 2]-??1?000?????11????21111100010110-2010000010120110010?1??01011-[1 2][0 1]000?1?01?111100110[2 3]??1???0110000?1??[4 5]00-1????0??1011??0000?-1?????…
Smilosuchus_spp	??1010100211100000122000001[2 3]000-02--0-001000?00-11-0-0--110000100102002000[3 4]10000-0-11000??100-01000[2 3]0010110000000100-0-001000100-1100010000111011100011020022-00-0-2-111002-10112100?0001131-12011----00020111201010111040-0101?112010000?010001-0110000?100?11??1?21111100010110-20100000110200010101?1?110?1-20100?1101011110011[0 1]2?01001011000001??400-11?2100010111000001-10010010-1???110?0…
Diandongosuchus_fuyuanensis	?2?0101101?1100110?1?1?00002000002?20000?100?00-01-0030-110000200??0001000220?0000?01012??1100011002001031000010110000-??1000100001000101010110101001100100?2-00?0-2-???0?2-10?12?00?00???????2?????????020????010????10?????????1????????0???1????????????????????0?10?00001?0?102010000010?1011001??1??0101?021000?????0?????????2???00??1???00?1??300?11?11???1?0?????????1?[0 1]?10?0-???01???0?-?0001101?0…
Wannia_scurriensis	2?1020??0111100???1???0000?????-?[2 3]--0-001[0 1 2 3 4]0??00-11-002?-1101?020010200?0003?000?-00?1?02???[0 1]???110??????????????????-?-?????????-???????????1???????????????2-0?-0-[0 1]1101?02-1?11?100?0001031-?2?1?----0??2011120101?111040-111??110110000?000?1[1 2]-?????00???1?1???1????????????????????????????????????????1??????????????????????????????????????????????????????????????????????????…
Ebrachosuchus_neukami	??102010011110000012?0000014001-02--?-?01000100-??-0010-110100200[1 2]020020003?0000-00010021-1000001003000011000010?100-0-001000100-0101010100111000100010020022-00-0-2-101002-1011210000001?31-12??1----01?20??1201010111040-[1 2]?11?111111000?0?0?1[1 2]-0?1?000???1?11??1????????????????????????????????????????1???0?1000???????????????????????????????????????????????????????????????????????????????…
Paleorhinus_sawini	2?101010011110010012000?0014001-02--0-001000?00-11-000?-110100200[1 2]02001???3?0000-00?100???1???0?00020000110000?0?10?-0-??1000100-01000?0100?11000?00011020?22-00-0-2-101002-10112100?000???1-?2??????????2??1120101?111040-?[0 1]???111110010?0?0?0[1 2]-?????00?????1????????????????????????????????????????????1??????????1?0??????????????10???110000010?30????????????????????????????????????????????…
Angistorhinus_talainti	2?00101002111100001[1 2]0000001[2 3 4]0??-02--0-001000?00-11-000--110100200102002000310010-0-01012??100-0000020010100000100102-0-??1000100-0101010000111001100011020022-00-0-2-101002-10113100?1001?31-12011----?0120??12010?0111040?11?10?12010000?0?0????????000???1?111?1?201?11010101?????10000010?20??001??1???101???1000?????????????????????????????????????????????????????????????????????????????????…
Mystriosuchus_planirostris	2?10201002[1 2]11100002200000014001-02-----01000?00-1[1 2]-0010011010020010000[1 2]00041[0 1]0[0 1]0-0-0100-??10010000031000110000100100-0-??1000100-[0 1]100000001111000[1 2]00011020022-00-0-2-111002-1011[2 3]100?000?131-020??----0??2011120101?111?40-01???112[1 2]10000?0?0?????????00???1?????0?2?10?100?1?110-201000001[0 1]02011001??1??110?0?2[0 1]1?0?1???011110011????[1 2]00??110?0??100[4 5]00-11…
Machaeroprosopus_pristinus	2?10101002111100001200000014001-02-----01000?00-1[1 2]-000--11010010010[0 2]002000[3 4][1 2]0010-0-11000??10?-00000300001[0 1]0000[0 1]01102-0-??1000100-110101000001100[0 1][1 2]00011020022-00-0-2-111002-1011210000001131-12011----00020111201011111040-?1???112010000?0?0?0[1 2]-0?1??00???1?1???1?201[0 1]1100110110-201000001102011001011??110?1-?[0 1]??0???0???????????[2 3]??10????10?00010??0??1?????…
Redondasaurus_spp	2?1?2010021111000012[0 1]000001[2 4]001-02-----01000?00-11-000--110100100100002000[3 4]?0010-0-11000??10?-000003000011000010?10?-0-??1000100-1101010000111000[1 2]00011020022-00-0-2-111002-10112100??001131-120??????????0111?0101?111040-?1???112?1[0 1]000?0?0?0[1 2]-0?1??00???1?1?????201[2 3]1100110110-2010000010020010010????11011-2[0 1]??0???????????????????????????????????????????????????????????…
Ornithosuchus_woodwardi	2?00100100011002?011110001121100020210101300?00-01-0031-1101001002?000100011000000001101???20100000[2 3]0010000-0000010000-??100010111000010001011000100010030022-0100-2-101002-10?1[2 3]00000??1131-110?1----0002011?20?0?0111??????????????????????????????????????????1?001?01?201?1??????0000?1?030?1???0?????1010021000?100??11110011?????????1?0?00?10??0?-11????10101?1?0?00?-1?0?10????0??010?010110011…
Riojasuchus_tenuisceps	2?00?-000001110210112100011221?0020210101300?00-01-0-31-1101000002?000100011001000001101??02010000020010000000002100-0-??100010000000010000011000100010030022-01-0-2-001002-1001200000001131-110[0 1]1----00020?1020?010111040-0??1?111110000?01001?????0000???1?1???1?001301320??110-2100000110030?10010011111010021000?1000000000011020020010110000?100[4 5]00-1??[1 2]?00000111000001-100011???1??0?0???101?…
Venaticosuchus_rusconii	2?00????000?110??0?1???001122?000??2101013?0?00-?1-0-31-1101?00002?000?0001???????????????0?010000??0?????????????????-??????????????????????????????1003002???????????????????12??0000?1131-110[0 1]1----0?02????2?????????????????11?????00?010?1??0?1?000???????????0013013200?110-2???00011003000001001???10100[1 2]1000???????????????????????????????????????????????????????????????????????????????????…
Dynamosuchus_collisensis	2?00??0??00?1??????????0?11?21000???????1300???????0????1?0???0??21?0??000????????????????????????0????????????0?10000-00100??????????10?00011000100010??002??011??????????????1?000100??????????????????????????????????????????11????????1011?????0000???????????0013?132?0?11??21?0000110?30?10010?????10100[1 2]1000?1??1?110000110???20?????0100010??0??1??????000????00????1???1???????00???01????01??001…
Nundasuchus_songeaensis	2?????????????????????????????????????????????????????????????????????????[2 3 4 5]???????????????????????????????????????????-????????????????????????????????????????????????????????????????????00?????3--001?2?????????????????????????????????????????????????????????0????0[0 1]11100??????000??21?20?0?????????1????21000?1?01?110100111?00????01?0?0??10??0?-11????0[0 3]10??100?001-1?[0 1]0?010-1????…
Turfanosuchus_dabanensis	?1001001?001100010?1[1 2]?00001101000[1 2]0210201[1 2]00?00-00-0020-110000001??0011000[2 3][1 2]001001101111??010001100200100?000000111100-??100010110011010010?11001100010?20??2-0010-??10?00??100120000000???001???13--?01?2????????1?1??040-2?01?110?10000?1100100???0000?20??110???0010000101?0?10??00000111020?0001??????10??021000?10010?11100110???[1 2]000??10000?10??10-?1??????20??1?01011-???00010-1…
Gracilisuchus_stipanicicorum	2?001[0 1]11000110001011[1 2]0000011010002021020?200?00-00-0020-11[0 1]10010120001100031000001101111??01000110-20-103100000?110000-??10001111100[0 1]01100-011001-00110020022-0110-2-10100[1 2]?100130100000???1-1?0?1----01020110201010111040-?[0 1]???010???????1?001[1 2]-????000?????1???1?001000?10100?10??0000011102000001010??11010[0 1]21000?1?01?11110011020?10?10110100?100210-11?11100200?1001011-10…
Yonghesuchus_sangbiensis	???0?????001100?10?1???010110?0?0??21020120??00-?100021-1100?0001??0??100?2??0????1?1?110001000100-3001021???0????????-??????11???0?001??0-???001-00?1002002???????????????????1????00??1??00?[0 1]??13--?01?2???????????????????????10?????????0?1[1 2]-????000???????????0010?0??0??????2?00000111?2???001?11??110?00[1 2]1000??????????????????????????????????????1?11?????????????????????????????????????…
Otter_Sandstone_archosaur	2?????????????????????????????????????????????????????????????????????????[2 3 4 5]???????????????????????????????????????????-????????????????????????????????????????????????????????????????????????????????????????????????????????????????????????????????????????????0????0[0 1]10100??????000??????????????????10???21000???????????????????????????????????????????????????????????????????????????????…
Revueltosaurus_callenderi	2[1 2]0020000001100010[0 1]11000-012010011020020110??00-01-003[2 3]-110100300200?0100011000000001102??01000110121000200000001112-0-00100112000000010001011000100010020022-00-0-2-10?0?2-??01?000010????1-?????----00020?102???1?1?1041-11010?100100000110012-0110001?001011101?0212?0210000110200000002102001001010??110102210011100001011?0111?0?10010100?1??10?200-11?[1 2]11?00001100?001-10[0 1]?00?0-1?100…
Aetosauroides_scagliai	2?001[0 1]0000011002?01[1 2]110001140000010200001100?00-01-0030-111100[0 1]01110001000210001-1001002??0100011012?000110000000100-0-??1001020-01?1010010?10001-00010?2102??00-0-[1 2]?11?01????0120000[0 1]0????1-1?0[0 1]1----0102????201110111041-1011??11210001?010?12-0011000?????111?1?02120001010010-2001000121020011010101?11010021000?10000111100010200200101000000101200-11?[1 2]?[0 1][0 1]02001100100…
Aetosaurus_ferratus	21001100000110011011100000140?0001021000?200?00-01?0031-111000011??010?00011000101001001??01000110?10?1020000000[0 1]10000-??10010100010001000-011001000010021022-0010-2-111002-11?120000100???1-1?0??----010201112?1?1111104?-?0???11?0100000110012-????000???????????0?1200210?001101001000[0 1]11010??1010?0??11010[1 2]01100?10?0??????????2????????????????????????????000??1???????1??00010-10?0???001110…
Stagonolepis_robertsoni	21001100000110011011100000140?0001021000?200?00-01?0031-111000101210101000210001000010021-010000?0020010?0000000110000-??10010100010001000-011001000010020022-0010-2-111002-10?1200001001131-10001----010201112?1111111041-200111110100000110012-0010000??01?11111?021300210?0010-1001000111010?11010?0??11010[1 2]2110111010011??0001120020010110?00?10??00-11?11?0000111000001-10000010-103030020101000110001…
Ticinosuchus_ferox	2?00?????0??11????????[0 1]????????????????????????????002??1110?0000??3???0003??0????????????????????????????0?0??0?10??0-??[0 1]?0?????????????????????????????????????????????????????????????????????????????????????????????????????????????????????????????????????????1?0??001?1??????0?0?????????0????????10?0021000?1?01?111000?1?????000?110????1002?0-11?1110?1001?100011-10[0 1]?00????0??010201?[0…
Prestosuchus_nyassicus	??????????????????????????????????????????????????????????????????????????????????????????????????????????????????????-??[0 1]?0??????????????????????????????????????????????????????????????????????????????????????????????????????????????????????????????????????????????????????????????11?[1 2 3]???????11??????????????1101?11110[0 1]0[1 2][0 1]?001???01100100100?10-?????0?010011100011-??[0 1]00010…
Dagasuchus_santacruzensis	??????????????????????????????????????????????????????????????????????????????????????????????????????????????????????-??????????????????????????????????????????????????????????????????????????????????????????????????????????????????????????????????????????????????????????????????????????????????????????????????????????????????????????????????????????????????????????0?????????????????????????????…
Qianosuchus_mixtus	21000-??00011001[0 1]0?10?001012000003010000?10??00-1100020-1110002002?001100032000?-0001?11??0000011002?0100000000?0100?0-??1000000?010?010?00?11000100010020012-01?????10???2-?0011000?0??1??1-?????----01?201??????????1?????????????????????0?100????????????????????10???20??101020?0?0001?02??100?0?????10100210001?001??????00--2?0?00101???0??1??410-1102110???0??10?011-100?10???????3102011?00011?0?1…
Arizonasaurus_babbitti	22000-01?0??100?10???10????????????1??00?????00-???003--11100000?21001?0002?000??0?01?????0??0??100[2 3]00?000?????0?10000-0?1??0100?0010?10000?10000???01002?????0010-2-10???2-1??1?000??0????1-?????----?1?2011?20?01?111000-01011110?10000?1?101000010001020?11111??0????0100?01???[1 2]??0000?10?2???????11???1???021000?1001?11110[0 2]0--20010010110000010?4?0?11????02200?1101001?10[0 1]?10???1????????…
Lotosaurus_adentus	0?000-0100011002[0 1]02120002-121-000302000015--?00-1?01031-1110000001-0-0?0-0-?0001-0001002???????1100?1???00000000100000-1-100010010??00??000?0?010??00100[1 2 3]???2-0010-2-101002-10???00?????113????????????????????0?010111000-01?1?110110000?1100100?0?0001?201?111?1?001200?2??00?????-2--??10??1?1????10??-----------?1001??????00--20???0??1???0??1??[5 6 7]00-11?21?0???0?110?001-10[0 1]?1010-?????…
Ctenosauriscus_koeneni	??????????????????????????????????????????????????????????????????????????????????????????????????????????????????????-??????????????????????????????????????????????????????????????????????????????????????????????????????????????????????????????????????????????????????????????????????????????????????????????1?01??111000--???????????0?0?10??00-?1?2?????????10?001-10??1????????-????????????????????…
Hypselorhachis_mirabilis	??????????????????????????????????????????????????????????????????????????????????????????????????????????????????????-??????????????????????????????????????????????????????????????????????????????????????????????????????????????????????????????????????????????????????????????????????????????????????????????1?0??111000??????????????????????????????0??2001??0100????[0 1]???????????????????????????…
Waldhaus_poposauroid	??????????????????????????????????????????????????????????????????????????????????????????????????????????????????????-??????????????????????????????????????????????????????????????????????????????????????????????????????????????????????????????????????????????????????????????????????????????????????????????1?0??111?0?????????????????????????????????0?00?1?0100????[0 1]?[1 2]?????????????????????…
Vytshegdosuchus_zbeshartensis	??????????????????????????????????????????????????????????????????????????????????????????????????????????????????????-????????????????????????????????????????????????????????????????????????????????????????????????????????????????????????????????????????????????????????????????????????????????????????????????????????????????????????????????????????????????????????????????????????????????????????…
Bystrowisuchus_flerovi	??????????????????????????????????????????????????????????????????????????????????????????????????????????????????????-??????????????????????????????????????????????????????????????????????????????????????????????????????????????????????????????????????????????????????????????????????????????????????????????1?01?111?10100?????????????[1 2]?1?????-??????????????????????????????????????????????????…
Bromsgroveia_walkeri	??????????????????????????????????????????????????????????????????????????????????????????????????????????????????????-??????????????????????????????????????????????????????????????????????????????????????????????????????????????????????????????????????????????????????????????????????????????????????????????1?0??1111????????????????????????????????0?020??????????????10???1????????????????????????…
Xilousuchus_sapingensis	2?00?????001100???????00?01101000?0100001100?0???1?003--111??000021301?0003?00?1-0001??1??????????????????????????????-????????????????????????????????????????????????????????????????????????????????????????0??1?1?1000-01111110?10000?111010?0010001020??1100??0?1??00100011?????000??10?2???????11??11???021000?1?01?1111?00--?00100101110100100[4 5]10-?1??1????????10?0????????????0????????????????????…
Moenkopi_poposauroid	??????????????????????????????????????????????????????????????????????????????????????????????????????????????????????-??????????????????????????????????????????????????????????????????????????????????????????????????????????????????????????????????????????????????????????????????????????????????????????????1????????????????0????[1 2]11?????0?????????????????????????????1????1????????????????????…
Mandasuchus_tanyauchen	2???????????1??????????????????????????????????????103??1????0?00[1 2]0?01?0002???????????????????????????????????????????-??????????????????????????????????????????????????????????????????????????????????????????????????????????????????????????????????????????????????????1????????00??????????????????1????2100??100101111001[1 2]02??100101100010100310-1??11100201?1101011-100??0???1???01???1?100011…
Luperosuchus_fractus	2?00000??00?10?210???10????????????21?00?????0???????[2 3]0?11010??????????????10?10?010110???0??00?100?0?????0?00000?1100-00100010110000??0000???000??00?????????00?????????????1???0?0?????????????????????2?????0111????0??-??00??1??????????????????????????????0??????????????????????????????????????????????[1 2]???????????????????????????????????????????????????????????????????????????????????????…
Decuriasuchus_quartacolonia	21000-0[0 1]0001110[1 2]10?1210010110?0003021000?20??00-01-0030-11010010121001100031001?-0001101??0100001002000000000000010000-00100010110100010110[0 1]11000000010020022-0010-2-1010?2-1001?000??0????1-?????----0102?1???0?1??1?1??????????????????????????????????????????1?0?1000?00?0?1102??0000110?2001001?11???1010021?001?001??????01??2???0000110?0??100210-1????????????10?010-1???0010-?????1??0????…
Batrachotomus_kupferzellensis	2?000001?0011002102?2100101101010?0110001200?20-0[0 1]00130-1110001?02100110002?0011-11010011-01000?10020?00?00000?0101000-001000101100110100?0011000?01010020?22-0010-2-101012-1?012000000??1?1-?1???----000201102011101?1040-11101110?100100110012-???0000121?11111??0010001001011102100000111020010??011??110??021000?1001111110011[0 1]???200101100000100400-11?[1 2]1[0 1]0020001101001-?0[0 1]010?0-1???3…
Prestosuchus_chiniquensis	210000010001110210212100101[0 1]0100020210001200?00-01-0030-11010010121001100022001100001001??0100011002001001000000000000-00100010110000110110011000001010020022-0010-2-101012-1101100000001131-110?1----01020110201110111040-11[0 1]1?110110000?110012-0010000??01?111?1?0010002000011102[0 1]0000011102001001011111101002100011001?111100110200?00001100000100210-11?2100020001100001-10000010-1??001?001110…
Scleromochlus_taylori	?2?00-1[0 1]?00?100[0 1]?0?1??0???1???????????????0??0??0??????-11?0?0?????000?00??1?0???????????????0??????0?????????????0?00-?????????0????????????????????????????????0-2-??????????????????????????????????1??????????????????????????????0?????0?0???????00??????????????????0??????????[0 1]?0?????????0????????[0 1 2]?1???1?????0????????????2?????????????????????1???????????[0 1]???0???1??00??0-???…
Austriadraco_dallavecchiai	0???0-??000?????[1 2]0???????????????31[1 2]1????[0 1 2 3 4]?????????????????????????????????????????????????200?0??02?000?0??????210???-?????00????0??0??????????????????????????????????????????????????????????????????????????????????????????1?????1?????0?0???????30????????????010??0[0 2]?1??10-211[0 1]0001220100000????????1???[0 2]1000?1?0???????????????????1???0?0?0??????1??????????1?0??????0??…
Preondactylus_buffarinii	0200????0001100??0?????0?0-300?003111000?20??0???1??00--1110?0000??010?0003????????????????200?0???[1 2 3]??????????????????-????????????????????????????????????????????????????????????????????????????????????????????????????????????????????????????????????????????00????000?00?????1000??20??0??????????11110121000???0???????????????001???????????????11?2??1?????????????10??[0 1]?????0????01[0 1]??…
Austriadactylus_cristatus	0?000-??0001100[0 1]?0?11?0??0-210???3111?00?10??00-11?????-1111??10???010100????00?-0?0100????2000??????????????????1????-??????000???0??1??00???001[1 2]?0?????????????????????????000-??0?0??????????????????????????????????????????????????????????????????????????????00-??02?????????1[0 1]00??20??0??????????11110221000??00???????????2???001????????1??2?0??1?21???????????0????0????????0????01?0??[…
Seazzadactylus_venieri	0?00??????0?100?[1 2]0??????01???0?????1??-??20??00-?1-0?0-?1110?0000??010[1 2]0??2?????????[1 2]??????200000001?0?0??????????????-?????00????00?0?0????????????????????????????????????1????0??????????????????????02????2???1??????0-???1?11???0?00???0?????????30???????????000-?0020101?????1100??22??0???????????[0 1]11020[0 1]000?1?0??????????????????????????1??2?????????00???11???0???1?0?1?????????…
Raeticodactylus_filisurensis	??00????0101100?10?1[0 1]?0000-100000310---??20??00-11-0010-111100210??010200?2??000-00?1?01???30000??????????????????????-?????00??0?????????????????????????????????????????????00-????0??????????????????????????????????????????????????????????????????????????????00-??100??110-[1 2]01100??200?0???????????[0 1 2]110201000?1?0??1111?00--????????????1[0 1]?1?????-?1???3??1001??0000?-10??????????????…
Carniadactylus_rosenfeldi	?200????01011000[1 2]0?1[0 1]??0??1?00????10---??20???0-11???0--111??0100??01010??2????????0???????30000000????0?0???????1????-?????1000???0?01??00???01?0?????????????????????????????0-????1???????????0----0?02?????010???1???0????1?11?21010??????????????30????????????00-??02?1?1?????1100??10??-???????01?1?1102010001??????????????2?????????0???????????11?[1 2]????????????????10?????????????0?00?0?…
Peteinosaurus_zambellii	0?????????????????????????????????????????????????????????????????????????????????????????????????0???????????????????-?????0??????1????????????????????????????????????????????????????????????????????????????????????????????????????????????????????????????????0??0??2?1?0???[1 2]??[0 1]00??????0???????????[0 1]1???[0 1]?000??00???????00--?????????????????????-?1????0??0??1?0?001-?0??10???10?00?110…
Caelestiventus_hanseni	0?000-02??0?100??0???10???-????????1??0??????00-???000--1110?0100[1 2]1010[1 2]0002??000-000[1 2]???????000000?0------?????1211-10-2-????????????????????????????1??2?????1-00-2-??????????????????????????????????????????????????????????????????????????????????????????????000-0002?101???[1 2]?1?000?11??0??000??0???11?0201000???????????????????????????????????????????????????????????????????????????…
Dimorphodon_macronyx	0[2 3]00??0?0001100210?22?0000-3000003111000?200?00-11-0?0--111000100??010200?1??00?-??01002???200000000------???????1????-?????0000??00?010?01?1-00000??10?2-?1?????????????????000-??0?0?????????????????????????????????????????????????????????????????????????????000-0002?1001????1100??10??0??????????01110[0 1]01000?1?0???????00--???1?????????????????-11????[0 1]010??1?0????-10????????????01??0001…
Eudimorphodon_ranzii	02000-?20001100?10?10100001300000?11100??20??00-11-000--111000100??000100?4??000-0?01?00??03000000010000?0???001211-?0-?????0000??00?0????????????????????????1-?????????????0?0-??0?0?????00???????????????????????????????????11?????0??11???????????0???????????000-0?0201001??[1 2]01100??12??0???????0??11110201100???0???????????2??1001???0???????????1??2???0????1???????10?020???[0 1]???????[0 1]000?…
Rhamphorhynchus_muensteri	0[2 3]000-0001011101?0110000?01100?00310----1[2 3]01?00-12?0?0--1100-0000??01010000-1000-0?02000??0300000000-----------01100-0-2-2--00000000001010011-00000001000--02-?0-0-2-??1002-1000-000?0001031-1-0-0----0112??011010?111104?????1?11?2101???1?0??????1??30???1???????000-?1-20??0?????1100??10??0??0????0??110100010001100000000000--2??00001100?0?0101200-11?0???0?0011?0?0[0 1]1-1000[1 2]0?0-10????111…
Cacibupteryx_caribensis	0?000-000?011002101?[0 1]0????????????1??????????00-?????0--?1???000???0??[1 2]000???000?0-????0??0??00?00????????????????1?00-??????0?00??00???????????????????????????-0-2-1?10????0?0-?????001031-1-?-0----01?2???120?0111?1140-0??1?111210100?1?0?1????1?030??????????????????????????????????????????????????1????????????????????????????????????????????????????????????????????????????????????????????…
Allkaruen_koi	0???0-02??????????1????????????????????????????????????????????????????????????????????????????????????????????1?10-00-2-?????????????????????????????????????1-00-2-100002-1??????????????????????????????????0?01?1?1040-0011?111?10100?110012-???10301??1?111010?0????0[1 2]?01???????[0 1]0???????????????????1??????????1?01??????????????????1?0000??0???????????????????????????????????????????????????…
Lagerpeton_chanarensis	0???0-????????????????????????????????????????????????????????????????????4???????????????????????????????0?0000?101??-00????????????????????????????????????????????????????0?????????????????????????????????????????????????????????????????????????????????????001???020100??????100??????????????????00???00110?1?0???????00--????????????????????????????[1 3]010??0?01001-1?100010-1?200???0???1?011?[0 …
Ixalerpeton_polesinensis	0???0-01????1???[0 1]?1??????????????????????????0??????02??1????01??[1 2]0????00?4????????0??????????????????????0000?0?10000-00010?0????????????????????????????????0000-2-100002-1??????????????????????????????????011101?1040-10?1?112?10100?110012-???1000??01?11101?00????020100??????100??????????????????00??200??0?10??0[0 1]000000--?????????????0?1?????-11???[0 1]0000000??1??1?10100010-??[1 2]0?…
Kongonaphon_kely	0?0?????????10?????????????????????[0 1]?????????0?????1?[1 2 3]??1110?????[1 2]1??0?00?????????????????????????????????????????????-????????????????????????????????????????????????????????????????????????????????????????????????????????????????????????????????????????????????????????????????????????????????????0??2000?0?1???????????????????????????????????????????????????????????????????????????…
PVSJ_883	??????????????????????????????????????????????????????????????????????????????????????????????????????????????????????-????????????????????????????????????????????????????????????????????????????????????????????????????????????????????????????????????????????????????????????????????????????????????????????????????????????????????????????????????????????????????????????????????????????????????????…
Dromomeron_romeri	??????????????????????????????????????????????????????????????????????????????????????????????????????????????????????-??????????????????????????????????????????????????????????????????????????????????????????????????????????????????????????????????????????????????????????????????????????????????????????????1????????????????1???01???????????????????0000????????????????????????????????????????????…
Dromomeron_gregorii	????0-01????????????????????????????????????????????????????????????????????????????????????????????????????????010?00-?????????????????????????????????????2-?01????100000?1??????????????????????????????????011101?1040-10011112?101??011?01?????1??????1?111?1?????????????????????????????????????????????????????????????????????????????????????????????????????????????????????????????????????????????…
Dromomeron_gigas	??????????????????????????????????????????????????????????????????????????????????????????????????????????????????????-????????????????????????????????????????????????????????????????????????????????????????????????????????????????????????????????????????????????????????????????????????????????????????????????????????????????????????????????????????????????????????????????????????????????????????…
Lagosuchus_talampayensis	[0 1]???????????10????????0??????????????????????????[0 1]??????11????0????0?0?0002???????????????????????????????????????????-???????????????10?0??10000?000??????????????????????????12000?0?????????????????????????0?01?111041-1?01?110???[0 1]00?010002-?0?10001????1110?????????????????????????????????????????[0 1]010021??0?100101110000--2?020??0110?000100100-1????[1 2]10100?1??0011-1?00001??1011?…
Lutungutali_sitwensis	??????????????????????????????????????????????????????????????????????????????????????????????????????????????????????-??????????????????????????????????????????????????????????????????????????????????????????????????????????????????????????????????????????????????????????????????????????????????????????????1???????????????????????????????????????????????????????????0????????0????????????????????…
Asilisaurus_kongwe	2?000-0?000?1???[0 1]0???100001200000?0[1 2]01?0150-??????-10[2 3]?-1???002??[1 2]100010002?0000?00010?2????000?10????????000000?10010-00????????0????10??0?10000?000100[2 3]??????????????????????1?000??????????????????????1??02????????????????????????????????????????????????????00???0?00000??????1000?21?1??1????00???1????20001?1001?1111000--?1?2???01100100?0?100-11?2?110100?11000?1-100?00?0-10???…
Nyasasaurus_parringtoni	??????????????????????????????????????????????????????????????????????????????????????????????????????????????????????-??????????????????????????????????????????????????????????????????????????????????????????????????????????????????????????????????????????????????????????????????????????????????????????????1?01?1101000?????0???1110010110?2?0-????????10???10????-????10???0????????????????????????…
Lewisuchus_admixtus	2?00?????0??11??00[1 2]???000012?000??0[1 2]?1??120??0???[0 1]-002??110??000020000?0003????????0??????0?00??10020-0031????????????-?????0??01?001110??0?1000000001002002???????????????????120000000???00????05-2-0102101?20111?111040-100111101100000010002-00110001??1?11101?0?1??0?10000??????000?020?10?10????11??10?0[0 1][0 1 2]1000?1001?111100100210100001100110100??0-110??12010001?00011-10?00010-1??…
Silesaurus_opolensis	21000-01?00?10??002????0001100000??2?10?1100?0???1-103??1????00002100010002???00-0?011?2??1[1 2]000?10020??0??0?0000110100-00???0?0???011010?00??0010100?1002102??0010-2-111002-1??12000000????1-???[0 1]0----0102?01??0?11?111040-1?011110110000?01000000011[0 1]001201011101?00100010001111?1101000121010?1001000???10?0220111?1001?1111000--210[1 2][0 1]0101100000100300-11?2110010001100001-10001110-10100…
Heterodontosaurus_tucki	01000-02?00110000020210101110001020200011300100-01-00[2 3]3-110000000200101000210000-1001012??0100011001001000000000110010-002--110010001010000011001000011020022-00-0-2-111002-11?1200001001?31-???1?----010210???0111?111041-1001?110210000?010002-??11000???1?111?1?02100021001010-101001012012111001000??0111012[0 1]110?100100000000--21?00010100?10?100100-110?0[0 1]1?10111?00001-100?20???10?0000111021…
Lesothosaurus_diagnosticus	0?000-010001100000[2 3]1100000140000020200001100100-01-0033-110100000200001000310000-000100201000001000?0??0??000000110010-002--0100110000101000110110000110200[1 2]2-00-0-2-110002-1101200000001?31-11?10----0112101?2011101110??-?0011?122100000010012-00110000??0011101?021000000000110211000012002101001000??0101022111111001?0000000--???000101000100100?00-11???1?2101110000[0 1]1-100?211??1?101000?0021…
Herrerasaurus_ischigualastensis	2?000-0100011011002121001011000102020000?200?00-01001200110000000[1 2]130010003?0000-0001102??01000010020-0030000000?10010-002--0[0 1]00110010100000[0 1]0000000010020022-0010-2-101002-10?130000000???1-1???0----01?210?0201110111040-?0???111110000?010?12-????000???1?????1?001100[1 2]0011011010000001[1 2]1020010010?[0 1]1111010021000?1?01?1111000002102001011001[0 1]0100200-11?2?[0 1]00100?1100001-10…
Eoraptor_lunensis	?1000-010001100100?111012011100102021000?200?00-0100021-111000000??0001000310000001011020001000110030-0030000000?10?10-??2--1?0001110010000?11010000010020022-0010-2-100002-10012?00?0001??001?0?000210102111020?1??????40??0?1?111110000?0?0?0[1 2]-????000?????????????10000001?0???1????0012000011001110???1010121001?100101111000--2??[1 2]???01100100100100-11?2110010001100001-1000101??10101000001200001…
Buriolestes_schultzi	21000-01000?100000211001111110000??[1 2]10001200?00-0100021-11??00000[1 2]10001000410000-00011020100000110020-00300??000?10010-002--1?0001011010000010011000010020022-0010-2-101002-10?1200000001?3001?0?05-2-010211?0201110111040-100111111100000010012-00110001?010111010001000000100010110000012102001001010??110100210001100101111000--21120011110011010?000-11?[1 2]112010001100001-10000010-10100000?0?21…
Saturnalia_tupiniquim	?10?0-01????1???[0 1]0??????????????????????????????????02????????000??????0003????????01??200????????????????0??000?10010-002--?00000?000??0000?001??000???????2-0010-2-101002-10?12????0?????????????????????????0111????04???001111??10000001011??0011000??0?011101?0?1????001?0??????00???????????????????1?????1001?100101111000--2??2???11100100?00???-11?[1 2]111010101100??1-10001010-1010000??012[0 1]…
Tawa_hallae	2?000-010001100?00?12?01?11210010302000?1300??0-01?0020-1110?000021000?000210????0??1?????0100??000??-??300?0000?10?10-??2--0?00??00?010000?10000000?1003002??0010-2-???00?-?0?12000000????1-?????----0??2101??0101?1?1040-100??111?10000?010012-0011?001??1?11111?0010001001001??1?00000121010??001??????1010021000?10?1?1111000--???2???0210010010??00-1???1?0?1?0??10?????1?0?0?????0???01?1??21000100011???…
Coelophysis_bauri	21000-01000110010021210101121001030110001200100-00-0030-110000000??0001000310000-0101102??01000110020-0030000000110010-002--010[0 1]10000010000?1?010000010030022-0010-2-101002-100120000000???1-1????----0??2101?20111?111041-200??111110000?010012-0011?00???1?111?1?0010001001101101110000121010??0010?011110100210001100101111000--31?100012100100100100-11?2111010001100001-100?2?10-10?001111002100110001…
Megapnosaurus_rhodesiensis	2?000-010001100?00?1?10101121001030110001200?00-?1-003[0 1]-11000000020000[1 2]0003?0000-0?01102??01000110020-0030000000110010-002--0100??000010?00?11010000?10030012-1010-2-101002-1??12000000????1-11???----0112110?20?11?1?1041-10?1?111?10000?110012-00110001??1?111?1??010000001001????10000?21010??001??0???101?021000?100101111000--31?10001210?10?100100-110?112010??110?001-100?21???1010?01110?210011…
;
ccode	+ 0 1 6 9 16 18.20 27 28 33 35 39 41 45 49 53 65 70 73.75 99 121 126 145 152 155 156 170 175 176 186 201 220 226 262 265 277 278 282 323 326 330 336 341 344 350 351 353 360 364 367 369 376 378 385 386 397 409 413 423 424 429 434 445 447 453 454 457 459 462 463 469 471 477 481 482 484 488 489 501 503 509 515 519 520 528 536 545 551 555 556 566 568 570 573 580 581 587 635 647 651 661 700 730 734 73…
taxcode- ISIR_1132 Protanystropheus_antiquus Trachelosaurus_fischeri Tanystropheus_haasi UFRGS_PV_492_T Malerisaurus_all_NA Arctosaurus_osborni CRILAR_Pv_461 CRILAR_Pv_462 CRILAR_Pv_497 Chanares_rhynchosaur PVSJ_2728 Eorasaurus_olsoni Archosaurus_complete FC_DPV_2641 UFSM_11444 UFSM_11394 Vonhuenia_fredericki C_rossicus_combined C_magnus_combined Chasmatosuchus_vjushkovi Koilamasuchus_gonzalezdia…
proc /;
comments 735
{0 51 Based on Reisz (1977: fig. 2) (MDE, 18 September 2012).;
{0 164 Borderline_--_depends_on_left_vs_right_parietal..._(DM);
{0 239 Based on Reisz (1981: 24) (MDE ,10 February 2014).;
{0 267 Based on Reisz (1981: fig. 11) (MDE, 10 February 2014).;
{0 291 Based on Reisz (1981: 26) (MDE, 10 February 2014).;
{0 302 Based on Reisz (1981: 27) (MDE, 10 February 2014).;
{0 324 Based on Reisz (1981: 30) (MDE, 10 February 2014).;
{0 330 Ratio=2.02 in the fourth cervical vertebra based on Peabody (1952: fig. 3) (MDE, 18 September 2012).;
{0 331 Based on Reisz (1981: 37) (MDE, 28 March 2015).;
{0 352 Based on Reisz (1981: 33, 34) (MDE, 6 March 2014).;
{0 356 The ratio is lower than 0.5 based on Reisz (1981: 34) (MDE, 2 April 2013).;
{0 364 Based on Reisz (1981: 34) (MDE, 12 February 2014).;
{0 380 Based on Reisz (1981: 36) (MDE, 12 February 2014).;
{0 382 Based on Peabody (1952: 22) and Reisz (1981: 4) (MDE, 12 February 2014).;
{0 473 Based on Reisz (1981: 42): a second, smaller process extends ventrolaterally from the ridge connecting the lateral pubic tubercle to the acetabulum. This process ... probably served as the origin of the ambiens and pubotibialis muscles (MDE, 12 February 2014).;
{0 563 Based on Peabody (1952: fig. 6a) (MDE, 12 February 2014).;
{0 871 26 (MDE, 7 May 2021);
{1 111 The frontals are only preserved in the juvenile specimen (MDE, 11 May 2021);
{2 89 The lacrial duct opens laterally on the lacrimal, close to the posterior margin of the bone (MNHN 1908-32-57) (MDE, 10 August 2013).;
{2 107 The morphology of the suture between the prefrontal and nasal cannot be confidently determined and, particularly, because the skull is exposed in medial view (MNHN 1908-32-57) (MDE, 11 August 2013).;
{2 122 The anterior end of the anterior process of the preserved postorbital and the parietals are missing. As a result, it is not possible to determine if the postfrontal participated in the supratermporal fenestra or not (i.e. if it was a contact between the postorbital and parietal) (MNHN 1908-32-57) (MDE, 10 August 2013).;
{2 127 Only the mould of the medial surface of the postorbital is preserved and it cannot be determined the morphology of the lateral surface of the bone (MNHN 1908-32-57). Accordingly, the state of this character was changed from (0) to (?) (MDE, 10 August 2013).;
{2 149 It is not clear if the quadratojugal was absent or not (Bicklemann et al. 2009) (MDE, 10 August 2013).;
{2 336 The cervicals lack a depression or pit lateral to the base of the neural arch (MNHN 1908-32-57). Accordingly, the state of this character was changed from (1) to (0) (MDE, 11 August 2013).;
{2 349 Based on Currie (1980) (MDE, 6 February 2014).;
{2 352 The condition of this character cannot be confidently determined in the holotype of Acerosodontosaurus (MNHN 1908-32-57). As a result, it is preferred here to score the character as (?) rather than (1) (MDE, 11 August 2013).;
{2 356 This ratio should be similar to Youngina because of the very short transverse processes (MDE, 6 February 2014).;
{2 367 Currie (1980) described that the dorsal ribs are holochepahlous and agrees with personal observation of MNHN 1908-32-57 (MDE, 6 February 2014).;
{2 427 Based on MNHN 1908-32-57 (MDE, 2 June 2013).;
{4 20 The skulls that preserve the anterir tip of the maxilla are strongly dorsoventrally compressed and, as a result, the scoring is codified as missing data (MDE, 7 February 2014).;
{4 26 Based on Gow (1975: fig. 1) (MDE, 15 October 2012).;
{4 33 Based on GHG K 106 (MDE, 7 February 2014).;
{4 35 Based on BP/1/2871 (MDE, 27 March 2015).;
{4 41 Based on Broom (1922:273) and Gow (1975) (MDE,12 February 2014).;
{4 44 Based on SAM-PK-K7578 (MDE, 6 September 2014).;
{4 48 Based on GHG K 106 (MDE, 7 February 2014).;
{4 75 Based on GHG K106 (MDE, 20 November 2012).;
{4 88 The foramen for the opening of the nasolacrimal duct could not be located in any of the studies specimens (e.g. BP/1/2459, 3859, GHG K 106, GHG RS 160, TM 1490, 4095) (MDE, 11 August 2013).;
{4 89 The foramen for the opening of the nasolacrimal duct could not be located in any of the studies specimens (e.g. BP/1/2459, 3859, GHG K 106, GHG RS 160, TM 1490, 4095) (MDE, 11 August 2013).;
{4 90 The ventral margin of the ventral temporal bar (i.e. formed by the posterior process of the jugal and the anterior process of the quadratojugal) is concave in BP/1/3859 (MDE, 11 August 2013).;
{4 94 Based on BP/1/3859 (MDE, 7 February 2014).;
{4 107 The suture between the prefrontal and nasal is anterolaterally oriented along its entire extension (BP/1/3859, GHG K 106) (MDE, 11 August 2013).;
{4 164 Ratio_suture_anterior/posterior_to_foramen_in_Carroll_1981:_fig._9:_7.15/5.58_(ML);
{4 191 Based on UC 1528 (MDE, 6 September 2014).;
{4 192 Based on UC 1528 (MDE, 6 September 2014).;
{4 196 Based on Gow (1975: 94) (MDE, 10 February 2014).;
{4 221 Based on Evans (1987: 195) (MDE, 7 September 2014).;
{4 224 Based on Gardener et al. (2010: fig. 3) (MDE, 15 October 2012).;
{4 233 Based on Evans (1987: fig. 2a) (MDE, 7 September 2014).;
{4 239 Based on Evans (1987: 196) (MDE, 7 September 2014).;
{4 249 Based on Evans (1987: 201) (MDE, 31 March 2015).;
{4 256 Based on Gardner et al. (2010: 8) (MDE, 9 February 2014).;
{4 270 Based on GHG K 106 (dorsally expanded) and SAM-PK-K8565 (mostly horizontal) (MDE, 9 February 2014).;
{4 298 Based on Gow (1975) and pers. obs. of BP/1/3859 and GHG K 106 (MDE, 11 August 2013).;
{4 304 Crowns are labiolingually compressed in GHG RS 160 and GHG K106, but not compressed in TM 1490 (MDE, 9 February 2014).;
{4 308 The hyoids were not recognized in the studied specimens and neither mentioned by Gow (1975) (MDE, 12 August 2013).;
{4 323 Based on Smith and Evans (1996) (MDE, 11 February 2014).;
{4 356 Ratio=0.46 based on BP/1/3859 vertebrae 9?12 (MDE, 2 April 2013).;
{4 365 Based on Gow (1975: 95) (MDE, 15 October 2012).;
{4 382 Based on Smith and Evans (1996: fig. 4c, d) (MDE, 3 September 2013).;
{4 403 The presence of cleithrum is uncertain in Youngina capensis (Smith and Evans, 1996: 296) (MDE, 3 September 2013).;
{4 408 The anterior half of the interclavicle is T-shaped, with sharp angles between lateral and posterior processes (Gow, 1975: 9c; Smith and Evans, 1996: 6c) (MDE, 3 September 2013).;
{4 411 Based on Gow (1975: 95) (MDE, 15 October 2012).;
{4 412 The presence of mineralized sternal plates in Youngina was confirmed by Smith and Evans (1996) (MDE, 4 September 2013).;
{4 413 50.9 mm estimated forelimb in SAM-PK-K7710a based on BP/1/3859. 67 hindlimb of SAM-PK-K710a. Ratio= 0.76 (MDE, 22 September 2014).;
{4 414 Based on BPI/1/3859 (MDE, 15 October 2012).;
{4 426 A supinator process and an ectopicondylar groove are present is Youngina (BP/1/3859). Accordingly, the scoring of this character was changed from (?) to (1) (MDE, 11 August 2013).;
{4 429 Youngina lacks an olecranon process in the ulna (Gow 1975: fig. 9a) (MDE, 11 August 2013).;
{4 433 The distal end is concave in BP/1/3859, but possibly because of the lack of complete ossification of the distal end (MDE, 11 February 2014).;
{4 435 Based on Gow (1975: 97) (MDE, 15 October 2012).;
{4 440 Based on Gow (1975: 95) (MDE, 29 March 2015).;
{4 454 The pelvic girdle is solid in Youngina (BP/1/3859). Accordingly the scoring of this character was changed from (1) to (0) (MDE, 11 August 2013).;
{4 470 Based on Smith and Evans (1996: 297) (MDE, 3 September 2013).;
{4 478 Based on Smith and Evans (1996: 297) (MDE, 3 September 2013).;
{4 507 BP/1/3859 was prepared with acid and, as a result, the thickness of the bone wall may look artificially thinner (MDE, 11 February 2014).;
{4 532 It seems that it was present in adult specimens (Broom, 1921; Smith and Evans, 1996: fig. 8d) (MDE, 3 September 2013).;
{4 562 Based on Broom (1921) (Smith and Evans: 1996: fig. 8d) (MDE, 3 September 2013).;
{4 563 The metatarsal IV + digit 4 are considerably longer than the tibia (Smith and Evans, 1996: table 1) (MDE, 4 September 2013).;
{4 565 The metatarsals overlap proximally with each other (BP/1/3859). Accordingly the scoring of this character was changed from (?) to (1) (MDE, 11 August 2013).;
{4 871 Probably 24 based on Smith and Evans 1996 (MDE, 7 May 2021);
{5 710 There is no anterior process in the lacrimal (MDE, 10 May 2021);
{5 871 24 (MDE, 7 May 2021);
{6 19 The ratio based on the preserved mould of rostrum is 0.38 and it could have been slightly higher if the rostrum extended more anteriorly, thus, it was scored as 0/1 (MDE, 25 May 2021).;
{8 76 The snout of AM 3585 is broad and the natural moulds of the nasals indicate that these bones were dorsal elements (MDE, 3 September 2012).;
{8 163 The dorsal surface of the parietals are too damaged to determine confidently the size and shape of the pineal foramen (MDE, 14 February 2014).;
{13 871 25 based on MACN-Pv Ac0391 (MDE, 7 May 2021);
{14 115 The posterolateral process of the frontal is long and the suture with the parietal forms an acute angle with the parasagittal plane (Fraser, 1982: fig. 1c). Accordingly, the scoring of this character was changed from (1) to (2) (MDE, 11 August 2013).;
{14 163 25.5% based on Fraser (1982: fig. 1c). Accordingly, the scoring of this character was changed from (1) to (0) (MDE, 11 August 2013).;
{14 191 Based on Fraser (1982: 718) (MDE, 16 September 2012).;
{14 289 The postdentary bones of Planocephalosaurus are fused with each other (Fraser, 1982) and, as a result, it is not possible to determine the degree of exposition of the angular in lateral view (MDE, 11 August 2013).;
{14 304 Based on Fraser (1982: 714, 719) (MDE, 3 March 2014).;
{14 330 The exact position of the cervical vertebra illustrated by Fraser and Walkden (1984: fig. 5) (MDE, 12 September 2012).;
{14 331 Based on Fraser and Walkden (1984: 576) (MDE, 3 March 2014).;
{14 332 Based on Fraser and Walkden (1984: 576) (MDE, 31 March 2015).;
{14 345 Based on Fraser and Walkden (1984: 580) (MDE, 12 September 2012).;
{14 356 Ratio=0.18?0.25 based on Fraser and Walkden (1984: figs. 5, 6) (MDE, 2 April 2013).;
{14 369 Second sacral bifurcated, contrasting with the first one (Fraser Walkden, 1984) (MDE, 12 August 2013).;
{14 409 The posterior ramus of the interclavicle is not known (Fraser and Walkden 1984) (MDE, 12 August 2013).;
{14 424 In Planocephalosaurus the entepicondyle is strongly developed in comparison with the shaft width at mid-length (Fraser and Walkden 1984: fig. 14). Accordingly, the scoring of this character was changed from (0) to (1) (MDE, 14 September 2012).;
{14 454 The acetabulum is completely closed (Fraser and Walkden 1984: fig. 16) (MDE, 12 August 2013).;
{15 21 Based on Evans (1980: fig. 1) (MDE, 20 September 2012).;
{15 41 Based on Evans (1980: 223) (MDE, 20 September 2012).;
{15 44 The presence of a septomaxilla is equivocal (Evans 1980: 220) (MDE, 20 September 2012).;
{15 74 Based on Evans (1980: 225) (MDE, 20 September 2012).;
{15 75 Based on Evans (1980: fig. 1c) (MDE, 20 September 2012).;
{15 89 Based on Evans (1980: 212) (MDE, 20 September 2012).;
{15 137 The condition is almost identical to that of Planocephalosaurus (compare Evans 1980: fig. 1 and Fraser 1982: fig. 1) (MDE, 20 September 2012).;
{15 149 Based on Evans (1980: 216) (MDE, 20 September 2012).;
{15 156 Based on Evans (1980: 212) (MDE, 20 September 2012).;
{15 163 Ratio=21.67% based on Evans (1980: fig. 9a) (MDE, 20 September 2012).;
{15 224 Based on Evans (1980: 227) (MDE, 14 February 2014).;
{15 227 Based on Evans (1980: fig. 1) (MDE, 21 September 2012).;
{15 246 Based on Evans (1980: 227) (MDE, 20 September 2012).;
{15 298 Based on Evans (1980: 236) (MDE, 20 September 2012).;
{15 306 Based on Evans (1980: 237) (MDE, 15 February 2014).;
{15 330 Ratio=ca. 1.22 based on Evans (1981: fig. 4c) (MDE, 21 September 2012).;
{15 331 Based on Evans (1981: 84) (MDE, 15 February 2014).;
{15 356 Ratio=0.15?0.30 based on Evans (1981: figs. 5, 6) (MDE, 2 April 2013).;
{15 381 Based on Evans (1981: fig. 11b) (MDE, 21 September 2012).;
{15 382 Based on Evans (1981: 91) (MDE, 10 October 2012).;
{15 391 Based on Evans (1981: 95) (MDE, 21 September 2012).;
{15 411 Evans (1981: fig. 15) clearly shows that the clavicle articulates with the ventral surface of the interclavicle (MDE, 10 October 2012).;
{15 429 Based on Evans (1981: 97) and the presence of a distinct and large posterior depression in the distal end of the humerus (MDE, 21 September 2012).;
{15 541 The astragalus possesses a deep, ventrally opened notch in anterior or posterior view to receive the distal tarsal 4 (see Evans, 1981: fig. 27a, b) (MDE, 17 February 2014).;
{15 581 Based on Evans (1981: 105) (MDE, 17 February 2014).;
{15 753 Based on Jenkins et al. 2017 (MDE, 09 December 2019);
{17 871 24 (MDE, 7 May 2021);
{19 48 Based on Evans (1990: 208) (MDE, 4 April 2015).;
{19 331 Based on Evans (1991: 190) (MDE, 5 April 2015).;
{20 368 Based on MNHN.F.BR12154 (MDE, April 10 2015).;
{22 353 The condition cannot be determiend in most of the dorsal vertebrae (MDE, 10 March 2014).;
{22 424 The condition seems to be more similar to that of Youngina capensis (BP/1/3859) than to that of Prolacerta broomi (BP/1/2675) (MDE, 20 June 2012).;
{23 7 The parietals have a median, longitudinal sagital crest, and the surface immediately lateral to it are not depressed as it should be the case in a supratemporal fossa (NMK S 180) (MDE, 13 February 2014).;
{23 18 Based on Gottman-Quesada and Sander (2009: fig. 9) (MDE, 12 February 2014).;
{23 21 The condition of this character cannot be confidently assessed because the skulls of Protorosaurus are hevely crushed and compressed (MDE, 3 September 2012).;
{23 38 Based on Gottman-Quesada and Sander (2009: 140): the maxilla is underlain by the subnarial process of the premaxilla (MDE, 13 May 2021);
{23 41 Based on Gottman-Quesada and Sander (2009: 140) (MDE, 3 September 2012).;
{23 51 Based on Modesto and Sues (2004) and Gottman-Quesada and Sander (2009) (MDE, 16 September 2012).;
{23 74 Gottman-Quesada and Sander (2009: 141) described 28 (+-1) tooth positions in the maxilla of NMK S 180 (MDE, 3 September 2012).;
{23 149 The presence of a quadratojugal is doubtful in Protorosaurus (MDE, 3 September 2012).;
{23 152 The presence of a quadratojugal is doubtful in Protorosaurus (MDE, 3 September 2012).;
{23 158 Gottman-Quesada and Sander (2009: 142) (MDE, 10 September 2012).;
{23 163 Gottman-Quesada and Sander (2009: 142) described that the presence of a pineal foramen seems to be a variable condition in Protorosaurus (MDE, 3 September 2012). ;
{23 186 Based on Gottman-Quesada and Sander (2009: 146) (MDE, 13 February 2014).;
{23 194 Gottman-Quesada and Sander (2009:146) (MDE, 10 September 2012).;
{23 213 Based on Gottman-Quesada and Sander (2009:146) (MDE, 3 September 2012).;
{23 216 Based on BSPG 1995 I 5 (MDE, 16 September 2012).;
{23 271 In at least two specimens (NMK S 180 and the Simon and Bartholomaeus specimen) seem to be two posterior processes in the dentary (MDE; 31 March 2015).;
{23 298 The height of the maxillary tooth crowns in labial and linguals views is subequal in the Simon Bartholomaeus specimen (SMNS 55387). This suggests that the tooth implantation is subthecodont (MDE, 15 February 2015).;
{23 302 Gottman-Quesada and Sander (2009: 148) described the crowns of Protorosaurus as straight. However, in BSPG 1995 I 5 (cast of WMsN P47361) a few maxillary teeth are slightly distally curved. As a result, I scored this character as polymorphic in Protorosaurus (MDE, 3 September 2012).;
{23 309 Gottman-Quesada and Sander (2009: 153) said that the presence of a notochordal canal in the vertebrae of the Protorosaurus specimens cannot be assessed. However, in the cast MB R2173 (original probably destroyed during WWII) the surface of the posterior facet of the centrum is concave and clearly not notochordal (MDE, 24 September 2012).;
{23 331 The specimens are too transversely compressed to determine the condition of this character (MDE, 13 February 2014).;
{23 336 The seventh cervical of WMsN P47361 has a shallow excaviation next to the base of the neural spine, but the more anterior cervical vertebrae lack such depression (MDE, 3 September 2012).;
{23 356 Ratio=0.38?0.45 based on postaxial vertebrae 8, 9 and 11 of BSPG 1995-I-5 cast of WMSN P47361 (MDE, 2 April 2013).;
{23 367 Based on Gottman-Quesada and Sander (2009: 158) (MDE, 3 September 2012).;
{23 372 Based on SMNS 55387, cast of the Simon Bartholomeus specimen (MDE, 13 February 2014).;
{23 374 Based on Gottman-Quesada and Sander (2004: 159) (MDE, 10 October 2012).;
{23 403 The presence of a cleithrum is ambiguous in Protorosaurus Gottman-Quesada and Sander (2009) (MDE, 3 September 2012).;
{23 413 Length of the forelimb of BSPG 1995 I 5, cast of WMsN P 47361: 203.8 mm. Lenth of the hindlimb of BSPG 1995 I 5, cast of WMsN P 47361, based on extrapolations with NHMW 1974 1635: 318.3 mm. Ratio: 0.64 (MDE, 22 September 2014).;
{23 424 The degree of development of the entepicondyle in Protorosaurus is more similar to Youngina than to Prolacerta (WMsN P47361) (MDE, 3 September 2012).;
{23 427 IN BSPG 1995 I 5 there are a well-developed condyle next to the ectepicondyle and it is very likely that its degree of development is understimated due to the strong dorsoventral degree of compression that suffered the bone. The same condition or even more developed distal condyles are observed in other individuals and in BSPG AS VII 1207 there is evidence of at least three distinct dista…
{23 444 Based on BSPG 1995 I 5 (MDE, 10 September 2012).;
{23 462 Based on Gottman-Quesada and Sander (2009:165) (MDE, 10 September 2012).;
{23 463 Based on Gottman-Quesada and Sander (2009: 165) (MDE, 26 February 2014).;
{23 470 In the Simon/Bartholomaeus specimen the thyroid fenestra is absent (SMNS cast, MDE pers. obs.) (MDE, 9 August 2013);
{23 487 Based on Simon and Bartholomaeus specimen (MDE, 31 March 2015).;
{23 489 The humeri and femora are strongly compressed and the diameter of the bones cannot be measured (MDE, 3 September 2012).;
{23 490 Based on BSPG AS VII 1207 (MDE, 13 February 2014).;
{23 508 Based on SMNS 55387 cast of Simon and Bartholomeus specimen (MDE, 13 February 2014).;
{23 510 Based on SMNS 55387 cast of Simon Bartholomaeus specimen (MDE, 12 March 2014).;
{23 531 Based on Gottman-Quesada and Sander (2009: 172) (MDE, 3 September 2012).;
{23 538 Based on Gottman-Quesada and Sander (2009: fig. 25c) (MDE, 13 February 2014).;
{23 556 Based on SMNS 55387, cast of the Simon Bartholomaeus specimen, and Gottman-Quesada and Sanger (2009: figs. 25) (MDE, 10 September 2012).;
{23 562 It would be possible that the distal tarsal 5 is fused to the distal tarsal 4 (Gottman-Quesada and Sander (2009: 172) (MDE, 3 September 2012).;
{23 575 Based on Simon-Bartholomaeus specimen cast SMNS 55387 (MDE, 23 April 2014).;
{23 871 23 (MDE, 7 May 2021);
{24 871 at least 53 based on Rieppel et al. 2008 (MDE, 7 May 2021);
{25 362 Based on SMNS 54783 (MDE, 22 September 2014).;
{25 365 There is an intercentrum at least between the last two dorsals in SMNS 90600 (MDE, 29 August 2014).;
{26 34 Based on Peyer (1937: fig. 32) (MDE, 17 February 2014).;
{26 51 Based on PIMUZ T4822 (MDE, 16 September 2012).;
{26 58 Based on PIMUZ T4355 (MDE, 29 August 2014).;
{26 94 Based on PIMUZ T4822 (MDE, 10 October 2012).;
{26 112 Based on PIMUZ T4822 (MDE, 10 October 2012).;
{26 120 Based on PIMUZ T2472 (MDE, 17 February 2014).;
{26 129 The posterior process of the quadratojugal does not reach the posterior border of the supratemporal fenesrtra defined by the squamosal (PIMUZ T4822) (MDE, 30 August 2012).;
{26 152 I couldn't recognize a quadratojugal in Macrocnemus specimens (MDE, 30 August 2012).;
{26 184 Based on Peyer (1937: 55) (MDE, 17 February 2014).;
{26 188 Based on Besano II (BSPG 1973 I 86);
{26 194 Based on Peyer (1937: 60) and Besano II (MDE, 6 September 2012).;
{26 260 Based on PIMUZ T2472 (MDE, 17 February 2014).;
{26 298 The teeth are implanted into deep alveoli and not ankylosed to the tooth-bearing bone. The lingual margen of the alveoli seems to be lower than the labial margen, thus, the character is scores as subthecodont based on PIMUZ T2472, T4355 and T4822 (MDE, 30 August 2012).;
{26 312 Based on PIMUZ T4355 (MDE, 2 June 2013).;
{26 314 Based on PIMUZ T2472 (picture 386) (MDE, 10 September 2012).;
{26 315 Although a centrodiapophyseal lamina seems to be present in PIMUZ T4822, the strongly compressed nature of the Macrocnemus specimens turns difficult to assess the condition of this character (MDE, 10 September 2012).;
{26 316 Based on PIMUZ T4822 (10 September 2012).;
{26 330 Ratio: 3.76-3.83 in PIMUZ T4822 and this ratio is higher in larger specimens such as PIMUZ T4355 (MDE, 6 September 2012).;
{26 339 Based on PIMUZ T4822 (MDE, 16 September 2012).;
{26 345 Intercentra are present in the cervical series of PIMUZ T4822, but absent in PIMUZ T2472 and T4355 (MDE, 11 September 2012).;
{26 354 Although in at least one dorsal vertebra of PIMUZ T4822 there is a circular foramen in the lateral surface of the centrum, I couldn't recognize this feature in any other vertebra of other specimens (MDE, 10 October 2012).;
{26 356 Ratio=0.56 based on PIMUZ T2472 (MDE, 2 April 2013).;
{26 372 Based on PIMUZ T2472 (MDE, 10 September 2012).;
{26 381 Based on PIMUZ T2472 (MDE, 22 September 2014).;
{26 411 Based on PIMUZ T4355 (MDE, 10 October 2012).;
{26 414 The condition of the character is not clear in the available specimens due to the strong degree of compression of the materials (MDE, 10 September 2012).;
{26 435 Based on PIMUZ T4355 (MDE, 10 October 2012).;
{26 454 The acetabular wall appears to be partially open in PIMUZ T4822 probably because of lack of preservation (MDE, 18 February 2014).;
{26 556 Based on Rieppel (1989: 380) (MDE, 18 February 2014).;
{26 563 Based on PIMUZ T4822 (MDE, 18 February 2014).;
{29 330 The holotype and only known specimen seems to be a juvenile and there is evidence that cervicals become proportionally longer during ontogeny in tanystropheids. Thus, this species was not scored (MDE, 28 December 2015).;
{29 372 The bifurcated second sacral rib is preserved in the left bottom of the specimen, and it was not identified by Fraser et al. 2013 (MDE, 28 December 2015).;
{34 44 Following Dilkes (1998) and Nosotti (2007) (MDE, 2 September 2012).;
{34 60 Based on WIld (1973: fig. 5, 6) (MDE, 20 June 2012).;
{34 65 Based on Wild (1973: fig. 26) (MDE, 7 March 2014).;
{34 75 Based on Wild (1973) (MDE, 2 September 2012).;
{34 77 Based on PIMUZ T2484 (MDE, 11 September 2012).;
{34 84 Based on Wild (1973: fig. 1: f.n.) (MDE, 20 June 2012). ;
{34 89 Based on Wild (1973: fig. 1: f.n.) (MDE, 20 June 2012). ;
{34 107 Based on Nosotti (2007: fig. 44) (MDE, 2 Septermber 2012).;
{34 114 Based on PIMUZ T2189 (MDE, 7 March 2014).;
{34 115 Based on PIMUZ T2189 (MDE, 7 March 2014).;
{34 122 Based on Nosotti (2007: 81) (MDE, 11 August 2013).;
{34 149 The quadratojugal is absent (Wild, 1973, Nosotti, 2007) (MDE, 22 June 2012).;
{34 152 Tanystropheus lacks of a quadratojugal (Wild, 1973: figs. 8?10) and Nosotti (2007) (MDE, 20 June 2012).;
{34 156 This character is scored as unkown based on Nosotti (2007) (MDE, 2 September 2012).;
{34 158 In small individuals the parietals are not fused to each other, whereas the opposite occurs in large individuals (Nosotti 2007: 51). We have considered here only the adult condition (MDE, 11 September 2012).;
{34 163 The size of the pineal foramen seems to range between 26.90% to 18.09% (Wild, 1973: fig. 1) (MDE, 20 June 2012).;
{34 164 In different specimens the pineal foramen is positioned at the frontal-parietal suture or it is completely enclosed by the parietals (Nosotti 2007: 51). As a result, this character was scored as polymorphic for Tanystropheus longobardicus (MDE, 2 September 2012).;
{34 185 Based on Wild (1973).;
{34 187 The condition of this character seems to be variable within Tanytropheus longobardicus (Wild 1973, Nosotti 2007: 80) (MDE, 11 September 2012). Based on Wild (1973) (MDE, 10 March 2014).;
{34 210 Based on Nosotti (2007: 12) (MDE, 10 March 2014).;
{34 221 Based on PIMUZ T2189 (MDE, 10 March 2014).;
{34 297 Based on comparisons between the maxillae and dentaries several specimens (MDE, 10 March 2014).;
{34 298 Wild (1973) says that the kind of tooth implantation of Tanystrophaeus is subthecodont (page 48) (MDE, 20 June 2012).;
{34 302 Tanystropheus is strongly heterodont and the crowns possess a strong to slight distal curvature or completely lack it (MDE, 20 June 2012).;
{34 308 Based on Nisotti (2007, fig. 12) (MDE, 2 September 2012).;
{34 330 Ratio=14.25 in the fourth cervical of PIMUZ T2818 (MDE, 11 September 2012).;
{34 331 Based on Pritchard et al. (2015) (MDE, 28 March 2015).;
{34 335 Based on PIMUZ T2189 (MDE, 10 March 2014).;
{34 339 Based on PIMUZ T2818 (MDE, 11 September 2012).;
{34 340 Based on PIMUZ T2818 (MDE, 11 September 2012).;
{34 352 Based on SMNS 55341 (MDE, 09 August 2013).;
{34 356 Ratio=0.46 based on Wild (1973: fig. 52) (MDE, 3 April 2013).;
{34 357 Based on PIMUZ T2818 (MDE, 2 September 2012).;
{34 367 Based on Wild (1973: fig. 35) (MDE, 20 June 2012).;
{34 381 Based on PIMUZ T2817 (MDE, 11 September 2012).;
{34 389 The anterior margin of the scapular blade is not distintly concave, but neither continuously convex (MDE, 12 March 2014).;
{34 435 Based on Nosotti (2007: table 4, 6) (MDE, 11 October 2012).;
{34 439 Based on Nosotti (2007: 30, fig. 23) (MDE, 12 March 2014).;
{34 440 Based on Nosoti (2007: fig. 23) (MDE, 20 June 2012).;
{34 441 Based on Nosoti (2007: fig. 23) (MDE, 20 June 2012).;
{34 510 Based on SMNS 54626 (MDE, 12 March 2014).;
{34 532 Based on Wild (1974: 116) and Nosotti (2007: 35) (MDE, 11 October 2012).;
{34 541 Based on Nosotti (2007: 72) (MDE, 13 August 2013).;
{34 563 Based on PIMUZ T2817 (MDE, 2 September 2012).;
{37 330 7.24 (MDE, 02 September 2019).;
{39 91 Based on ZAR 08 (MDE, 1 May 2014).;
{39 94 Based on ZAR 08 (MDE, 1 May 2014).;
{39 263 Based on the right side of ZAR 08 (MDE, 2 May 2014).;
{39 326 A keel is present on the axis of ZAR 07 (MDE, 2 May 2014).;
{39 356 Based on ZAR 08 (MDE, 2 May 2014).;
{39 406 Based on ZAR 06 (2 May, 2014);
{39 471 Pubis and ischium fused to each other (MDE, April 24 2020);
{41 509 ratio = 0.25 (MDE, 30 October 2020);
{41 515 ratio = 1.12 (MDE, 30 October 2020);
{43 88 No foramen for the lacrimal duct is present (Flynn et al., 2010: 677) (MDE, 18 February 2014).;
{43 89 No foramen for the lacrimal duct is present (Flynn et al., 2010: 677) (MDE, 18 February 2014).;
{43 99 The height of the base of the posterior process is measured orthogonally to the main axis of the process (MDE, 18 February 2014).;
{43 122 Based on Flynn et al. (2010: 679) (MDE, 14 February 2014).;
{43 136 Based on Flynn et al. (2010: fig. 1A) (MDE, 18 February 2014).;
{43 282 Flynn et al. (2010: 683) (MDE, 18 February 2014).;
{43 356 Ratio=0.49 in UA 8-26-98-265 (MDE, 18 February 2014).;
{47 415 Question mark because the holotype represents an immature individual (MDE, 7 November 2021);
{47 490 Question mark because the holotype represents a juvenile individual (MDE, 7 November 2021);
{47 509 Question mark because the holotype represents a juvenile individual (MDE, 7 November 2021);
{48 415 State 1 was scored here because the holotype of Malerisaurus langstoni very likely repressent a juvenile condition (MDE, 06 November 2021);
{49 35 The dorsolateral process of the premaxilla is well extended beyond the posteiror margin of the external naris (Spielmann et al. 2008: fig. 20). Accordingly, the scoring of this character was changed from (?) to (1) (MDE, 4 September 2012).;
{49 44 Based on Gregory (1945: 277) (MDE, 25 February 2014).;
{49 75 No skull of Trilophosaurus buettneri preserves both antorbital and postorbital regions (MDE, 4 September 2012).;
{49 76 The snout of Trilophosaurus buettneri is narrow and tall, and the nasal has a strong vertical contribution to the snout (Spielmann et al. 2008: figs. 20-22) (MDE, 4 September 2012).;
{49 88 The new interpretations of the skull of Trilophosaurus buettneri strongly differs from those of Gregory (1945) regarding the shape and position of the lacrimal and the foramen showed by this author should not be positioned within the lacrimal based on Parks (1969) and Spielmann et al. (2008). However, the latter author did not give information about the passage of the lacrimal duct in Tril…
{49 89 The new interpretations of the skull of Trilophosaurus buettneri strongly differs from those of Gregory (1945) regarding the shape and position of the lacrimal and the foramen showed by this author should not be positioned within the lacrimal based on Parks (1969) and Spielmann et al. (2008). However, the latter author did not give information about the passage of the lacrimal duct in Tril…
{49 90 The ventral margin of the postorbital region of the skull is severely damaged in TMM 31025-140 and the condition of the character cannot be confidently assessed (Spielmann et al. 2008: fig. 19) (MDE, 4 September 2012).;
{49 113 The orbital border of the frontal is broad in TMM 31025-207 (Spielmann et al. 2008: fig. 20e, f). Accordingly, the scoring of this character was changed from (0) to (1) (MDE, 4 September 2012).;
{49 149 The quadratojugal of TMM 31025-140 is broken and the anterior extent of this bone cannot be assessed with the currently available specimnes (Spielman et al. 2008: fig. 19). As a result, the scoring of this character has been changed from (2) to (?) (MDE, 4 September 2012). ;
{49 159 The parietals do not extend over the interorbital region in TMM 31025-140 (Spielmann et al. 2008: fig. 19) (MDE, 4 September 2012).;
{49 170 The postparietal cannot be discerned in Trilophosaurus buettneri (Gregory 1945: 278) (MDE, 4 September 2012).;
{49 205 Based on Spielmann et al. (2008: 27) (MDE, 13 November 2012).;
{49 213 The paroccipital processes of Trilophosaurus buettneri have a weak contact with the squamosal (Spiealmann et al. 2008: fig. 18) (MDE, 14 September 2012).;
{49 216 Based on Spielmann et al. (2008: figs. 25, 26) (MDE, 16 September 2012).;
{49 221 Based on Spielmann et al. (2008: 32) (MDE, 25 February 2014).;
{49 283 Scoring changed from that of PhD from (0) to (1) (MDE, 30 January 2015).;
{49 287 Based on Spielmann et al. (2008: fig. 27) (MDE, 16 September 2012).;
{49 288 Based on Pritchard et al. 2015 (MDE, 28 March 2015).;
{49 289 The exposition of the angular in lateral view is wide in TMM 31025-5 (Spielmann et al. 2008: fig. 28). Accordingly, the scoring was changed from (?) to (0) (MDE, 4 September 2012).;
{49 302 This scoring was changed from (1) to (2) because Trilophosaurus buettneri lacks of a distal curvature in the margin teeth (Spielmann et al. 2008: figs. 18, 20, 21) (MDE, 4 September 2012).;
{49 330 Some cervical vertebrae are longer then the posterior dorsals and others shorter (Spielman et al. 2008: appendix 10). Accordingly, the scoring of this character was changed from (0) to (0&1) (MDE, September 2012). Ratio=1.84-2.5 in the fourth and fifth cervical vertebrae based on Spielmann et al. (2008: appendix 10) (MDE, 13 September 2012).;
{49 345 Based on Spielmann et al. 2008 (fig. 30) (MDE, 13 September 2012).;
{49 356 Ratio=0.84 based on Spielmann et al. (2009: fig. 37) (MDE, 3 April 2013).;
{49 369 Trilophosaurus buettneri has two unequal sacral vertebrae (Spielmann et al. 2008) and, as a result, the scoring of this character was changed from (?) to (0) (MDE, 4 September 2012).;
{49 382 Based on the scoring of Pritchard et al. (2015: character 137) (MDE, 29 March 2015).;
{49 408 Gregory_1945:_pl._26._(DM);
{49 411 Based on Gregory (1945: 301) (MDE, 13 November 2012).;
{49 429 In Trilophosaurus buettneri the olecranon process is prominent but it is not ossified separately (Spielmann et al. 2008: figs. 69, 70). As a result, the scoring of this character was changed from (0) to (1) (MDE, 5 September 2012).;
{49 444 In TMM 31025-140 the lengh of manus is 16.8 cm based on Spielmann et al. (2008: fig. 74) and length of humerus is 17.0-17.6 based on Spielmann et al. (2008: appendix 10) (MDE, 13 September 2012).;
{49 470 Based on Gregory (1945: fig. 9) (MDE, 25 February 2014).;
{49 544 Gregory (1945: 316) described the absence of a strong "tuber calcis" in Trilophosaurus (MDE, 24 February 2014).;
{53 376 ca. 1.16-1.40 (MDE, 3 September 2021);
{53 471 ca. 0.38 (MDE, 3 September 2021);
{54 309 Based on Carroll (1976: 42) (MDE, 18 September 2012).;
{54 352 Based on AM 3591 (MDE, 18 September 2012).;
{54 357 Based on AM 3591 (MDE, 18 September 2012).;
{54 360 Dilkes (1998: 530) reported the absence of pits lateral to the neural spines in Noteosuchus. This condition is right for the preserved posterior dorsal vertebrae of AM 3591, but it could not be assessed in the anterior dorsal vertebrae. Although the pits are prensent in the posterior dorsal vertebrae of Howesia (SAM-PK-5886), in Mesosuchus the posterior dorsal vertebrae also lack of the p…
{54 372 Based on AM 3591 (MDE, 18 September 2012).;
{54 470 Based on Carroll (1976: 47) (MDE, 10 October 2012).;
{54 544 Based on Carroll (1976: 48) (MDE, 18 September 2012).;
{54 555 The reconstruction of the ankle of Noteosuchus by Carroll (1976) looks rather weird (MDE, 17 September 2014).;
{54 556 I consider that cannot be confidently assessed that the central did not contact the tibia (MDE, 18 September 2012).;
{54 562 Based on Carroll (1976: 48) (MDE, 18 September 2012).;
{54 565 Based on Carroll (1976: 48) (MDE, 18 September 2012).;
{55 8 Dilkes (1998: character 10) scored Mesosuchus has having confluent external nares and the condition is clearly visible in SAM-PK-6536 (MDE, 27 August 2012).;
{55 18 See discussion of Modesto and Sues (2004: 347) regarding the scoring of this character in Mesosuchus (MDE, 16 September 2012).;
{55 41 Mesosuchus has two premaxillary teeth (Dilkes, 1998: 511) (MDE, 27 August 2012).;
{55 44 Based on SAM-PK-6536. Inside the narial cavity, there is a pair of plate-like bones, with a dorsally raised medial margin that are almost identical to the septomaxillae of BP/1/4016 (MDE, 27 December 2015).;
{55 65 Based on Dilkes (1998: 505) and SAM-PK-6536 (MDE, 3 March 2014).;
{55 89 Based on Dilkes (1998: 505) (MDE, 13 September 2012).;
{55 156 The supratemporal of SAM-PK-6536 is considerably broader than the slit-like bone of Proterosuchus fergusi. Accordingly, it is scores as condition (0) (MDE, 27 August 2012).;
{55 163 Ratio=18.89% based on SAM-PK-6536 (Dilkes, 1998: fig. 5) (MDE, 27 August 2012).;
{55 170 Dilkes (1998: character 29) scores Mesosuchus as lacking of a postparietal (MDE, 27 August 2012).;
{55 185 Based on Dilkes (1998: character 38) (MDE, 11 September 2012).;
{55 203 Based on Dilkes (1998: 508) (MDE, 3 March 2014).;
{55 220 Cannot be determined bcause of the fusion between exoccipitals and basioccipital (MDE, 3 March 2014).;
{55 253 Based on Dilkes (1998: 509) (MDE, 3 March 2014).;
{55 254 Based on Dilkes (1998: character 48) (MDE, 3 March 2014).;
{55 255 Following Nesbitt (2011: character 94) (MDE, 5 March 2014).;
{55 312 Based on SAM-PK-6536 (MDE, 3 March 2014).;
{55 323 Based on SAM-PK-5882 and SAM-PK-6536 (MDE, 3 March 2014).;
{55 326 Based on SAM-PK-5882 (MDE, 3 March 2014).;
{55 329 Based on SAM-PK-6536 (MDE, 27 December 2015).;
{55 349 Based on SAM-PK-5882 (MDE, 27 August 2012).;
{55 356 Ratio=ca. 0.5 based on Dilkes (1998: 513) (MDE, 2 April 2013).;
{55 372 Based on Dilkes (1998: character 87) (MDE, 11 September 2012).;
{55 408 Although DIlkes (1998) described the interclavicle of Mesosuchus as T-shaped its anterior end is diamond-shaped (MDE, 27 August 2012).;
{55 427 Based on SAM-PK-6536 (MDE, 11 September 2012).;
{55 432 Based on SAM-PK-6046 (MDE, 4 March 2014).;
{55 444 No specimen preserves both complete humerus and manus (MDE, 11 September 2012).;
{55 508 Based on the femur of SAM-PK-7416 (MDE, 11 September 2012).;
{55 540 Based on SAM-PK-7416 (MDE, 23 September 2014).;
{55 544 Although a calcaneal tuber was scored as absent in Mesosuchus by Dilkes (1998: character 119) it can be observed in the right hindlimb of SAM-PK-7416 (MDE, 27 August 2012).;
{55 563 The distal phalanges of the fourth pedal digit are not preserved (MDE, 27 August 2012).;
{55 575 Based on SAM-PK-7416 (MDE, 23 April 2014).;
{55 580 The pedal digit IV is not completely preserved in the available specimens of Mesosuchus (MDE, 11 September 2012).;
{55 639 Based on Evans (1986: fig. 8) (MDE, July 31 2016).;
{56 18 See discussion of Modesto and Sues (2004: 347) regarding the scoring of this character in Howesia (MDE, 16 September 2012).;
{56 39 Based on Dilkes (1995: 669) (MDE, 10 September 2012).;
{56 67 Based on Dilkes (1998: character 16) (MDE, 10 September 2012).;
{56 74 I think that this character is not applicable for Howesia and more derived rhynchosaurs (MDE, 3 September 2012).;
{56 120 The maximum constriction of the olfactory tract mould is situated well posteriorly to the broken anterior margin of the frontals (SAM-PK-5885) (MDE, 7 March 2014).;
{56 163 Based on Dilkes (1995: 670) (MDE, 7 March 2014).;
{56 175 Based on SAM-PK-5885 (MDE, 3 September 2012).;
{56 191 Based on Dilkes (1995: 670) (MDE, 7 March 2014).;
{56 203 Based on Dilkes (1995: 670) (MDE, 10 September 2012).;
{56 205 Based on Dilkes (1995: 671) (MDE, 7 March 2014).;
{56 206 Based on DIlkes (1998: character 39) (MDE, 10 September 2012).;
{56 208 Based on Dilkes (1995: 671) (MDE, 7 March 2014).;
{56 224 SAM-PK-5885 seems to not be a fully mature individual (MDE, 7 March 2014).;
{56 228 The posterior surface of the occipital condyle of SAM-PK-5885 is strongly damaged (MDE, 7 March 2014).;
{56 239 Although Dilkes (1998: character 45) scored this character as (?) in Howesia the foramina for the exit of the carotids are clearly ventrally situated in the parashpenoid in SAM-PK-5885 (MDE, 10 September 2012).;
{56 289 Dilkes (1995) said that the mould of the angular indicates that it had a limited lateral exposure (MDE, 3 September 2012).;
{56 326 At least in the axis of SAM-PK-5885 (MDE, 3 September 2012).;
{56 336 At least in the axis of SAM-PK-5885 (MDE, 3 September 2012).;
{56 340 Based on the axis of SAM-PK-5885 (MDE, 10 September 2012).;
{56 372 Based on Dilkes (1998: character 87) and SAM-PK-5886 (MDE, 10 September 2012, 7 March 2014).;
{56 382 Based on Dilkes (1995: 676) (MDE, 7 March 2014).;
{56 386 The scapular blade of SAM-PK-5885 was apparently damaged (MDE, 7 March 2014).;
{56 389 The scapular blade of SAM-PK-5885 was apparently damaged (MDE, 7 March 2014).;
{56 391 Based on Broom (1906: plate 15) (MDE, 3 September 2012). ;
{56 405 Based on Broom (1906: plate 15) (MDE, 3 September 2012). ;
{56 408 Based on Broom (1906: plate 15) (MDE, 3 September 2012). ;
{56 427 The condition of this character cannot be confidently assessed based on Broom (1906) drawing and the humerus is currently lost (DIlkes 1998) (MDE, 11 September 2012).;
{56 534 The proximal tarsals are expoased in posterior view in the only specimen that preserves the hindlimbs (MDE, April 7 2015);
{56 544 Based on SAM-PK-5886 (MDE, 3 September 2012).;
{56 575 Based on Carroll (1976: fig. 8).;
{57 89 Based on the natural mould of the passage of the nasolacrimal duct (MDE, 8 September 2014).;
{58 191 Based on Benton (1990: 231) (MDE, 3 April 2014).;
{58 205 Based on NHMUK R1236 (MDE, 11 September 2014).;
{58 352 Based on NHMUK R1238 (MDE, 11 September 2014).;
{58 356 Based on SHYMS 2 (MDE, 11 September 2014).;
{58 358 Based on BATGM M20a (MDE, 30 October 2014).;
{58 359 Based on BATGM M20a (MDE, 30 October 2014).;
{58 372 Based on SHYMS 5 (MDE, 11 September 2014).;
{58 384 Based on NHMUK R1239 (MDE, 12 September 2014).;
{58 453 Based on SHYMS 6 (MDE, 12 Septemebr 2014).;
{58 476 Based on BATGM M20a, b (MDE, 30 October 2014).;
{58 534 The better preserved proximal tarsals are preserved in posterior view (MDE, April 8 2015).;
{58 563 Based on SHYMS 5 (MDE, 12 September 2014).;
{58 674 Based on SHYMS 5 (MDE, 6 September 2021);
{58 888 It is not clear if the ungual is longer than non-ungual phalanges of the same digit in available specimens (MDE, 18 September 2021);
{59 208 The occipital surface of hte braincase is very damaged (MDE, 9 September 2014).;
{62 633 The best preserved skull has a rather deformed temporal region (MDE, 27 December 2015).;
{71 7 Based on Whatley (2005: 19).;
{71 208 Based on Whatley (2005: 27) (MDE, 19 December 2015).;
{71 220 Based on Whatley (2005: 28) (MDE, 19 December 2015).;
{72 356 ratio = 0.70 in D5 of MACN-Pv 18185 (MDE, 17 March 2020);
{79 356 Ratio=0.70 based on PIN 156/110 (MDE, 2 April 2013).;
{80 302 Young (1973: fig. 1) illustrates a tooth crown with a convex mesial margin that it is not currently preserved in the specimen (MDE, April 7 2015).;
{81 44 The septomaxilla of Prolacerta broomi possesses a curved lateral lip (Modesto and Sues, 2004) and, as a result, is not a completely flat sheet of bone. Accordingly, the scording of this character was changed from (2) to (1) (MDE, 11 August 2013).;
{81 102 State 0 in SAM-PK-K10797 and state 1 in BP/1/3575 and BP/1/5375 (MDE, 5 March 2014).;
{81 136 Based on UMZC 2003.41R (MDE, 5 April 2014).;
{81 156 However, the specimen that I identified as Prolacerta broomi in the GHG collection (431) seems to lack supratemporals and a supratemporal facet in both squamosals (MDE, 19 June 2012). Is this specimen actually Prolacerta broomi?;
{81 170 The postparietals are absent in Prolacerta broomi (Modesto and Sues, 2004). Accordingly, the scording of this character was changed from (1/2) to (2) (MDE, 11 August 2013).;
{81 185 Based on the desarticulated vomer of BPI/1/2675 (MDE, 13 September 2012).;
{81 195 Based on BP/1/5066 (MDE, 5 March 2014).;
{81 196 Based on BP/1/5066 (MDE, 5 March 2014).;
{81 204 Based on BP/1/5066 (MDE, 5 March 2014).;
{81 208 Based on SAM-PK-K10018 and Gow (1975: 105) (MDE, 5 September 2014).;
{81 213 In Prolacerta broomi the paroccipital processes possess a weak contact with the posterior temporal region of the skull (BPI/1/471) (MDE, 14 September 2012). ;
{81 216 Based on BP/1/2675 (MDE, 5 March 2014).;
{81 219 Based on BP/1/5066 (MDE, 5 March 2014).;
{81 220 Based on BP/1/5066 (MDE, 5 March 2014).;
{81 221 Based on BP/1/5066 (MDE, 5 March 2014).;
{81 230 The occipital neck is extremely short in BP/1/2675 and anteroposteriorly long in BP/1/5066 (MDE, 5 March 2014).;
{81 246 Not_absolutely_sure.__Some_specimens_might_be_closer_to_1,_and_apparently_variable_(Evans,_1986:_186-187_and_figures_4,_5).;
{81 251 Based on BPI/1/2675 and GHG 431 (MDE, 12 October 2012).;
{81 267 Based on BP/1/2675 (MDE, 5 March 2014).;
{81 294 Based on BP/1/2675 (MDE, 23 September 2014).;
{81 298 Modesto_&_Sues_2004._(DM);
{81 308 Based on SAM-PK-K10797 (MDE, 5 March 2014).;
{81 314 Based on BPI/1/2675 (MDE, 13 September 2012).;
{81 315 Based on BPI/1/2675 (MDE, 13 September 2012).;
{81 316 Based on BP/1/2675 (MDE, 13 September 2012).;
{81 317 Based on BPI/1/2675 (MDE, 13 September 2012).;
{81 319 The posterior cervical and anterior dorsal vertebrae of BPI/1/2675 have mammillary processes on the lateral surface of the neural spines. Accordingly, the scoring of this character was changed from (0) to (1) (MDE, 14 September 2012).;
{81 330 Ratio=3.26 in the fourth cervical 3.68 in the fifth cervical vertebrae of BPI/1/2675 (MDE, 13 September 2012).;
{81 337 A transpostzygapophyseal lamina is present in the third cervical, but not in the fourth and fifth cervicals (BP/1/2675) (MDE, 2 April 2015).;
{81 345 Based on Gow (1975: 107) (MDE, 5 March 2014).;
{81 356 Ratio=0.55 based on BP/1/2675 vertebra 10 (MDE, 2 April 2013, 6 March 2014).;
{81 391 The supraglenoid foramen is absent in BP/1/2675. Accordingly, the scoring of this character was changed from (?) to (0) (MDE, 11 August 2013).;
{81 405 The interclavicle of Prolacerta lacks an anterior process (BP/1/2675). Accordingly, the scoring of this character was changed from (0) to (1) (MDE, 11 August 2013).;
{83 18 Based on Tatarinov (1978: 508) (MDE, 25 March 2014).;
{83 35 Based on Tatarinov (1978: 508) (MDE, 2 April 2015).;
{83 41 Based on Tatarinov (1978: 510) (MDE, 2 April 2015).;
{83 115 Based on Tatarinov (1978: 508) (MDE, 2 April 2015).;
{83 119 Based on Tatarinov (1978: 508) (MDE, 25 March 2014).;
{83 124 The condition is not consistent between Tatarinov (1978) and Benton & Allen (1997) (MDE, 25 March 2014).;
{83 136 The condition is not consistent between Tatarinov (1978) and Benton & Allen (1997) (MDE, 25 March 2014).;
{83 138 The condition is not consistent between Tatarinov (1978) and Benton & Allen (1997) (MDE, 25 March 2014).;
{83 144 The condition is not consistent between Tatarinov (1978) and Benton & Allen (1997) (MDE, 25 March 2014).;
{83 145 The condition is not consistent between Tatarinov (1978) and Benton & Allen (1997) (MDE, 25 March 2014).;
{83 147 The condition is not consistent between Tatarinov (1978) and Benton & Allen (1997) (MDE, 25 March 2014).;
{83 163 Based on Tatarinov (1978: 508) (MDE, 2 April 2015).;
{83 182 Based on Tatarinov (1978: 510) (MDE, 2 April 2014).;
{83 184 Based on Tatarinov (1978: 509) (MDE, 2 April 2015).;
{83 191 Based on Benton and Allen (1997: 936) (MDE, 2 April 2014).;
{83 198 Based on Tatarinov (1978: 510) (MDE, 2 April 2014).;
{83 257 The sphenethmoid described by Tatarinov (1978: 510) seems to have been too anterior to be a laterophenoid (MDE, 2 May 2014).;
{83 260 Based on Tatarinov (1978: 510) (MDE, 2 April 2014).;
{83 263 Based on Tatarinov (1978: 510) (MDE, 2 April 2014).;
{83 266 Based on Benton and Allen (1997) (MDE, 19 September 2014).;
{83 304 Based on personal observation of the cast of the skull (MDE, April 7 2015).;
{83 349 Based on Tatarinov (1978: 511) (MDE, 2 April 2015).;
{83 365 Intercentra were probably absent in the dorsal series, but the condition cannot be determined confidently (MDE, April 12 2015).;
{83 396 Based on Tatarinov (1978: 511) (MDE, 25 March 2014).;
{83 404 Based on Tatarinov (1978: 511) (MDE, 25 March 2014).;
{83 408 Based on Tatarinov (1978: 511) (MDE, 25 March 2014).;
{83 453 Based on Tatarinov (1978: 511) (MDE, 25 March 2014).;
{84 74 16 tooth positions based on Pinheiro et al. (2016: 22) (MDE, 05 December 2020);
{85 415 ratio=0.28 (MDE, 3 Octuber 2019);
{85 568 ratio=0.56 (MDE, 3 October 2019);
{85 570 ratio=0.67 (MDE, 3 October 2019);
{85 573 ratio=1.53 (MDE, 3 October 2019);
{86 18 In SAM-PK-K10603 the posttemporal fenestra cannot be observed, but it may be a result of the strong dorsoventral artificial compression suffered by the skull. In RC 846 the posttemporal fenestra is present as a foramen (MDE, 5 September 2014).;
{86 65 Based on CT data of BSPG 1934 VIII 514 (MDE, 5 September 2014).;
{86 88 Based on RC 846 (MDE, 5 September 2014).;
{86 89 Based on RC 846 (MDE, 5 September 2014).;
{86 115 In large specimens of Proterosuchus fergusi (e.g. SAM-PK-K10603) the fr-p suture forms a right to obtuse angle to parasagittal plane, but in smaller specimens (e.g. RC 59) the fr-p suture forms an acute angle, similar to Prolacerta (Modesto & Sues, 2004: fig. 4). Thus, this feature seems to be related to intraspecific variation (probably ontogenetic) in Proterosuchus fergusi (MDE, 19 June…
{86 129 The posterior process of the postorbital extends beyond the posterior margin of the supratemporal fenestra in Proterosuchus fergusi (e.g. BP/1/4016 and SAM-PK-K10603) (MDE, 19 June 2012).;
{86 156 Both supratemporals are clearly present in SAM-PK-K10603 and SAM-PK-K140 (MDE, 19 June 2012).;
{86 159 Proterosuchus fergusi possesses intraspecific variation for this character, in large specimens (e.g. SAM-PK-K10603) the parietal does not extend over the interorbital region, but in smaller specimens (e.g. RC 59) the parietal considerably extends over the interorbital region. Probably it is related to an ontogenetic variation (MDE, 19 June 2012).;
{86 163 In only one specimen of Proterosuchus fergusi I have seen a very small pineal foramen (BP/1/3993). In other well-preserved specimens the pineal foramen is definitely absent (e.g. RC 59, SAM-PK-K10603). So, this character seems to be polymorphic, as in Prolacerta broomi (MDE, 19 June 2012).;
{86 164 Scoring based on BP/1/3993 (MDE, 19 June 2012).;
{86 208 Based on BSPG 1934 VIII 514 and SAM-PK-K1603 (MDE, 5 September 2014).;
{86 245 Based on BP/1/3993 (MDE, 23 September 2014).;
{86 293 Based on RC 846 (MDE, 5 September 2014).;
{86 294 e.g. BSPG 1934 VIII 514 (MDE, 23 September 2014).;
{86 313 Based on SAM-PK-11208 (MDE, 5 September 2014).;
{86 314 Based on SAM-PK-K140 and GHG 363 (MDE, 12 September 2012).;
{86 317 SAM-PK-11208 has a thick postzygodiapophyseal lamina but other specimens (e.g. SAM-PK-K140 lack this lamina) (MDE, 12 September 2012).;
{86 336 The fifth to eight cervical vertebrae of Proterosuchus fergusi possess an excavation lateral to the neural spine, which is shallow in the middle cervicals and very deep in posterior cervicals, particularly in the eight cervical (BP/1/3993). These excavations are also present in Prolacerta broomi (MDE, 20 June 2012).;
{86 349 The presence of this accesory process is clear in BSPG 1934 VIII 514 (MDE, 20 June 2012).;
{86 352 Scoring based on SAM-PK-K140 (MDE, 20 June 2012).;
{86 358 Based on SAM-PK-K140 y GHG 363 (MDE, 5 September 2014).;
{86 406 Based on GHG 363 (MDE, 12 September 2012).;
{86 439 Based on SAM-PK-K140 (MDE, 6 September 2014).;
{86 563 The complete length of the fourth digit is not known in Proterosuchus specimens (MDE, 20 June 2012).;
{88 62 Most of the suture between maxilla and jugal cannot be diserned possibly because of the partial fusion between both bones (NMQR 880) (MDE, 24 March 2014).;
{88 149 Based on the facet on the quadrate (NMQR 1484) (MDE, 24 March 2014).;
{89 329 Based on a photograph in Cruickshank (1972), the neural spine of the axis is currently broken in NMQR 1484 (MDE, 11 May 2015).;
{90 575 Based on the Mtt V identified as a ?calcaneum by Young (1936: fig. 13d) (MDE, 23 April 2014).;
{92 0 The absence of interdental plates is particularly evident in the anterior end of the right dentary (UTGD 54655) (MDE, 12 March 2014).;
{94 350 ratio = 1.42 (MDE, 27 March 2020);
{99 319 Proterosuchids lack a transverse expansion of the neural spine posteriorly to the vertebrae with mammillary processes and, as a result, Koilamasuchus is scored with a question mark (MDE, 5 April 2014).;
{100 28 The palatal process of the maxilla is distinctly anteroventrally oriented and in other basal archosauriforms the palatal process of the premaxilla forms a ventrally facing obtuse angle with the alveolar margin of the bone. As a result, the premaxilla of Kalisuchus should have been downturned, resembling the condition in proterosuchids and Sarmatosuchus (MDE, 18 September 2014).;
{102 325 The atlantal intercentrum is preserved, based on unpublished photographs (MDE, 3 April 2015).;
{103 43 The holotype of Sarmatosuchus seems to be non-fully grown specimen because of the presence of an open neurocentral suture in the dorsal centrum (MDE, 9 March 2014).;
{103 221 Although scored in the data matrix of Gower and Sennikov (1997: character 34), they say in the text that no trace of the hypoglosal foramina can be detected (2 April 2014).;
{103 249 Based on scoring of Gower and Sennikov (1997: character 21) (MDE, 31 March 2014).;
{103 358 Hyposphene is present in the ninth presacral and an isolated dorsal neural arch (MDE, 13 March 2014).;
{103 383 The type specimen of Sarmatosuchus is not a mature individual (MDE, 13 March 2014).;
{104 293 There is an area filled with matrix that may represent a medial foramen on the articular, but it cannot be determined confidently (MDE, 12 April 2014).;
{105 840 Based on Peng (1991: page 102) (MDE, November 10, 2020);
{108 330 ratio = 1.09 and 1.31 in complete presacral series of PIN 951 64 (MDE, May 11 2020);
{108 350 ratio = 0.97-1.19 in the first five dorsal vertebrae of PIN 951 64 (MDE, May 11 2020);
{108 351 ratio = 0.90-1.30 in the last five dorsal vertebrae of PIN 951 64 (MDE, May 11 2020);
{108 376 ratio = 0.98 (MDE, May 11 2020);
{108 378 ratio = 2.03 PIN 951 65 (MDE, 11 May 2020);
{109 21 Based on BP/1/5207 and NHMUK R5392 (MDE, 21 June 2012).;
{109 24 Based on the right side of BP/1/5207 (MDE, 21 March 2014).;
{109 28 Based on the articulated skull BP/1/5207 (MDE, 21 June 2012).;
{109 82 Based on the left side of BP/1/5207 (MDE, 21 March 2014).;
{109 103 In BP/1/5207 the base of the posterior process of the jugal seems to be semi-elliptical, but it is not the case in BP/1/3893 (MDE, 10 April 2014).;
{109 113 The orbital margin of the frontal is narrow (MDE, 22 June 2012).;
{109 163 In well-preserved specimens of Erythrosuchus africanus (e.g. NM QR 1473) the pineal foramen is absent (MDE, 22 June 2012).;
{109 191 Based on Gower (2003: 31) (MDE, 16 September 2012).;
{109 204 Based on Gower (2003) (MDE, 21 March 2014).;
{109 208 Based on Gower (1997: 560) (MDE, 21 March 2014).;
{109 221 Based on Gower (1996: 560) (MDE, 21 March 2014).;
{109 251 Based on Gower (1997: fig. 4a) (MDE, 23 March 2014).;
{109 293 Based on Gower (2003: 35) (MDE, 26 August 2014).;
{109 298 It was added the fifth state. ' thecodont' to that of the data matrix of Reisz et al. (2010) for Erythrosuchus africanus (MDE, 20 June 2012).;
{109 326 Based on SAM-PK-3028 (MDE, 24 March 2014).;
{109 352 Based on NHMUK 3592 (MDE, 24 August 2012).;
{109 356 Ratio=0.85 based on NHMUK R3592 (MDE, 2 April 2013).;
{109 358 Based on NHMUK R3592 (MDE, 24 March 2014).;
{109 403 Since none of the preserved specimens of Erythrosuchus possess an articulated pectoral girdle I consider that the presence or absence of a cleithrum cannot be determined (MDE, 24 August 2012).;
{109 412 Since none of the preserved specimens of Erythrosuchus possess an articulated pectoral girdle I consider that the presence or absence of a mineralized sternum cannot be determined (MDE, 24 August 2012).;
{110 50 Based on Wang et al. (2013: fig 2a) (MDE, 27 March 2014).;
{110 217 Based on Gower and Sennikov (1996) (MDE, 26 March 2015).;
{110 249 Based on Gower and Sennikov (1996: 896) (MDE, 31 March 2014).;
{110 342 Based on NHMUK R3592 (MDE, 12 September 2012).;
{110 345 I am not sure if the elements described by Wang et al. (2013) in the neck of S. shansisuchus are actually intercentra. They are too large and overlap considerably the lateral surface of the centra (MDE, 27 March 2014).;
{110 355 Based on Young (1964: fig. 21f) (MDE, 27 March 2014).;
{110 356 ratio=1.13 based on Young (1964: fig. 21f) (MDE, 27 March 2014).;
{110 538 The identification of the posterior groove by Gower (1996) was tentative (MDE, 27 March 2014).;
{111 32 Based on Gower (2003: 15) (MDE, 25 September 2014).;
{111 352 Following Young (1964: pages 132 and 133) (MDE, 23 May 2021);
{114 330 ratio = 0.85 (MDE, 26 June 2020);
{114 350 ratio = 0.58;
{114 515 <1.22 (MDE, 06 June 2020);
{116 208 Based on Nesbitt et al. (2009: 826) (MDE, 25 April 2014).;
{116 210 Based on Nesbitt et al. (2009: 826) (MDE, 25 April 2014).;
{116 221 Based on Nesbitt et al. (2009: 826) (MDE, 25 April 2014).;
{116 446 Based on Nesbitt et al. (2009: 831) (MDE, 27 April 2014).;
{117 36 The posterior margin of the base of the postnarial process is broken off, but the facet for its reception on the maxilla shows that it was plate-like (MDE, 1 October 2014).;
{117 169 Nesbitt et al. (2013: 11) (MDE, 25 September 2014).;
{119 0 Based on UMZC T6921 (MDE, 28 March 2014).;
{119 24 SAM-PK-6048 lacks a subnarial foramen, but SAM-PK-6047 possesses a subnarial foramen formed by a notch on the maxilla (MDE, 31 March 2014).;
{119 51 The anterior maxillary foramen is absent in SAM-PK-13665 but it is present in other specimens (Gow 1970) (MDE, 16 September 2012).;
{119 62 Based on SAM-PK-6047A and the left side of SAM-PK-5867 (MDE, 18 September 2014).;
{119 65 Based on UMZC T692 and Gow (1970) (MDE, 28 March 2014).;
{119 66 Based on SAM-PK-6050 (MDE, 21 October 2014).;
{119 67 The ventral margin of the maxilla is slightly convex in SAM-PK-5867 (MDE, 11 September 2012).;
{119 88 Based on Senter (2003) (MDE, 28 March 2014).;
{119 140 Based on the left squamosal of SAM-PK-5867 (MDE, 28 March 2014).;
{119 186 Based on Gow (1970) (MDE, 14 February 2014).;
{119 201 Based on SAM-PK-13664 (MDE, 27 August 2012).;
{119 210 Based on SAM-PK-7696 (MDE, 28 March 2014).;
{119 212 Based on SAM-PK-7696 (MDE, 28 March 2014).;
{119 213 Based on SAM-PK-5867 (MDE, 14 September 2012).;
{119 220 Based on Gower and Weber (1998: 374) (MDE, 18 August 2014).;
{119 236 Based on SAM-PK-5867 and SAM-PK-7696 (cf. Gower and Weber, 1998, contra Nesbitt, 2011) (MDE, 19 April 2014).;
{119 237 Based on Gower and Weber (1998) (MDE, 22 August 2014).;
{119 239 The foramina for the entrance of the internal carotid are positioned ventrally in the basisphenoid in UMZC T692 (MDE, 11 September 2012).;
{119 248 Based on Gower and Weber (1998: 379) (MDE, 31 March 2014).;
{119 249 Based on Gower and Weber (1998: 377) (MDE, 31 March 2014).;
{119 255 Based on SAM-PK-7696 (MDE, 16 March 2015).;
{119 256 Based on Gower and Weber (1998: 379) (MDE, 31 March 2014).;
{119 271 The base of a posterodorsal process seems to be present in SAM-PK-5867 (MDE, 31 March 2014).;
{119 293 Based on UMZC T6921 (MDE, 31 March 2014).;
{119 317 Based on SAM-PK-6047B (MDE, 2 April 2014).;
{119 345 Based on Ewer (1965: 406) (MDE, 31 March 2014).;
{119 348 Based on SAM-PK-13665 (MDE, 31 March 2014).;
{119 356 Ratio=0.48 based on Ewer (1965: fig. 7g, h) (MDE, 2 April 2013).;
{119 365 Based on Ewer (1965: 406) (MDE, 31 March 2014).;
{119 372 The sacral rib of the second sacral of Euparkeria is not bifurcated (SAM-PK-7696) (MDE, 11 September 2012).;
{119 405 I consider that the anterior portion of the interclavicle of the holotype specimen is not enough preserved to assessed the condition of the character (MDE, 24 August 2012).;
{119 408 I consider that the anterior portion of the interclavicle of the holotype specimen is not enough preserved to assessed the condition of the character (MDE, 24 August 2012).;
{119 426 In the holotype of Euparkeria there is no supinator ridge neither a deep groove in the distal end of the right humerus (MDE, 24 August 2012).;
{119 449 Based on SAM-PK-13666 (MDE, 11 October 2012).;
{119 451 Based on SAM-PK-13666 (MDE, 31 March 2014).;
{119 540 Nesbitt (2011) scored Euparkeria as (1), but the posterior portion of the dorsolateral margin of the astragalus overlaps the calcaneum to the same extent as the anterior portion (UMCZ T692) (MDE, 25 September 2014).;
{119 587 Based on SAM-PK-6048 (MDE, 1 April 2014).;
{121 535 Inferred from tibial morphology (MDE, April 14 2015).;
{121 536 Inferred from tibial morphology (MDE, April 14 2015).;
{125 176 angle = 123 (MDE, 23 June 2020);
{125 566 ratio = 0.62 (MDE, 24 June 2020);
{126 536 Inferred from tibial morphology (MDE, April 14 2015).;
{127 18 Based on Dilkes and Arcucci (2012: 17) (MDE, 13 April 2014).;
{127 191 Based on Dilkes and Arcucci (2012: 16) (MDE, 14 April 2014).;
{127 220 The contact between exoccipitals on the floor of the endocranial cavity is uncertain (Trotteyn and Haro 2010, Dilkes and Arcucci 2012) (MDE, 14 April 2014).;
{127 224 Based on PVL 2063 (MDE, 14 April 2014).;
{127 237 Based on Dilkes and Arcucci (2012: 18) (MDE, 19 April 2014).;
{127 239 Based on Dilkes and Arcucci (2012: 18) (MDE, 19 April 2014).;
{127 247 Based on Dilkes and Arcucci (2012: 18) (MDE, 14 April 2014).;
{127 372 Based on Trotteyn (2011: 433) (MDE, 14 April 2014).;
{127 421 Trotteyn (2011) described that the shape of the deltopectoral crest cannot be determined because of postmortem deformation (MDE, 14 April 2014).;
{131 13 In the holotype the anterior border of the antorbital fenestra is pointed, whereas in PVL 4606 is gently rounded (MDE, 7 July 2014).;
{131 41 Based on the left premaxilla of PVL 4601 (MDE, 7 July 2014).;
{131 75 The suture between the frontals and parietals cannot be confidently traced in available specimens (MDE, 8 July 2014).;
{131 86 Based on PVL 4606 (MDE, 8 July 2014).;
{131 95 Based on PVL 4606 (MDE, 8 July 2014).;
{131 329 The dorsal margin of the neural spine of the axis is damaged in PVL 4601 and PVL 4602 (MDE, 19 October 2014).;
{131 576 Based on PVL 4606 (MDE, 26 September 2014).;
{132 20 ratio=0.27 (PVL 4604) (MDE, 19-2-2019);
{132 41 Based on Trotteyn et al. (2013) (MDE, 9 July 2014).;
{132 75 ratio=1.12 (PVL 4604) (MDE, 19-2-2019);
{132 220 Based on Trotteyn and Paulina-Carabajal (2016: 533) (MDE, 19-2-2019);
{132 265 ratio=0.05 (PVL 4604) (MDE, 19-2-2019);
{132 423 ratio=0.31 (PVL 4604) (MDE, 19-2-2019);
{132 489 ratio=1.25 (PVL 4604) (MDE, 19-2-2019);
{133 363 Based on Dilkes and Arcucci (2012) character 55 (MDE, 18 August 2014).;
{134 386 ratio = >7.7 (MDE, 06 November 2019);
{134 462 ratio = ca. 1.10 (MDE, 06 November 2019);
{134 477 ratio = ca. 1.28 or slightly lower (MDE, 06 November 2019);
{134 489 ratio = ca. 0.9 (MDE, 06 November 2019);
{134 509 ratio = ca. 0.15 (MDE, 06 November 2019);
{135 239 The entrance for the internal carotid seems to have been labelled as CN VI by Desojo et al. (2011) (MDE, 19 April 2014).;
{136 237 Based on Nesbitt (2011: 87) (MDE, 19 April 2014).;
{136 288 The posterior surangular foramen is present in MCZ 4037 but it seems to be absent in PULR 07 and PVL 4586 (MDE, 22 April 2014).;
{136 329 The dorsal margin of the neural spine of the axis is mostly straight in MCZ 4037 and dorsally convex in PVL 4575 (MDE, 19 October 2014).;
{137 15 The skull is strongly dorsoventrally compressed beause of taphonomic processes and the character cannot be confidently scored (MDE, 18 August 2014). ;
{137 43 The premaxillary teeth are lateroventrally oriented, but it may be a result of the strong dorsoventral compressio suffered by the skull (PVSJ 567) (MDE, 28 April 2014).;
{137 130 The skull is strongly dorsoventrally compressed beause of taphonomic processes and the character cannot be confidently scored (MDE, 18 August 2014). ;
{137 266 The specimen is too artificially compressed to determine the character-state (MDE, 19 September 2014).;
{141 54 0.24 based on Foffa et al. 2020 (MDE, 13 July 2021);
{141 262 0.59 based on Foffa et al. 2020 (MDE, 13 July 2021);
{141 265 0.17 based on Foffa et al. 2020 (MDE, 13 July 2021);
{141 314 Benton and Walker (2002: 33): "On the left-hand side, there is a low diagonally backwards-running ridge from the anteroventral margin of the centrum to the short transverse process, the parapophysis and diapophysis in continuum (MDE, 20 March 2017).;
{141 329 Based on first-hand observation of NHMUK PV R3139 (MDE, 20 March 2017).;
{141 350 ca. 1.9 based on Foffa et al. 2020 (MDE, 13 July 2021);
{141 423 ca. 0.33 based on Foffa et al. 2020 (MDE, 13 July 2021);
{141 434 0.77 based on Foffa et al. 2020 (MDE, 13 July 2021);
{141 447 0.27 based on Foffa et al. 2020 (MDE, 13 July 2021);
{148 330 ratio = 1.6 in Cv4 (MDE, 23 April 2021);
{148 350 ratio = 1.8 in D4 (MDE, 23 April 2021);
{148 351 ratio = 1.33 in D14 (MDE, April 23 2021);
{148 386 ratio = 8.73-11.00 based on estimations from both shoulder girdles (MDE, 24 April 2021);
{148 457 ratio = equal or lower than 0.21 (MDE, 24 April 2021);
{148 471 ratio = < 0.34 (MDE, 24 April 2021);
{148 515 ratio = slightly lower than 0.74 (MDE, 24 April 2021);
{148 566 ratio = >0.35 (MDE, 24 April 2021);
{148 568 ratio = <0.60 (MDE, 24 April 2021);
{148 871 23 (MDE, 7 May 2021);
{149 730 ratio=1.60 (MDE, 6 september 2019).;
{149 736 ratio=0.97 (MDE, 6 september 2019).;
{149 737 ratio=1.87 (MDE, 6 september 2019).;
{149 738 ratio=1.27 (MDE, 6 september 2019).;
{149 742 ratio=1.70 (MDE, 6 september 2019).;
{150 248 The suture between supraoccipital and prootic cannot be discerned (MDE, 22 January 2015).;
{150 255 Poorly preserved in the inferior anterior process (ISI, MDE 22 September 2015).;
{151 0 Nicrosaurus kapffi: NHMUK R38036, 38037, 42743, 42744, 42745, Huene 1923, Hungerb�hler 1998, 2000; Nicrosaurus sp. Hungerb�hler, 1998 (MDE;
{151 288 Based on NHMUK R38036, 42744 (MDE, 16 March 2015).;
{152 53 Based on UCMP 27200 and Nesbitt (2011: 96) (MDE, 6 May 2014).;
{153 65 Based on Walker (1964: 72) (MDE, 20 August 2014).;
{153 86 Based on Walker (1964: fig. 3a) (MDE, 20 August 2014).;
{153 95 Based on UCMP 27200, MCZ 1029 and Camp (1930: fig. 11) (MDE, 6 May 2014).;
{153 152 Based on the facet along the entire ventral margin of the posterior process of the jugal present in NHMUK R3142 (MDE, 20 August 2014).;
{153 353 Based on Walker (1964: 82) (MDE, 20 August 2014).;
{153 472 Based on NHMUK R2410 and Walker 1964: fig. 11g (MDE, 20 August 2014).;
{155 730 ratio=1.01 (MDE, 6 september 2019).;
{155 736 ratio=0.80 (MDE, 6 september 2019).;
{155 737 ratio=1.24 (MDE, 6 september 2019).;
{155 738 ratio=1.01 (MDE, 6 september 2019).;
{155 742 ratio=1.15 (MDE, 6 september 2019).;
{156 74 ca. 19-20 tooth positions based on the suture between premaxilla and maxilla on the palate (MDE, 2 October 2019);
{162 4 The dorsal surface of the skull of available specimens is too damaged to determine the state of this character (MDE, 7 May 2014).;
{162 461 In PVL 3828 there is a crest cofluent with the anterior border of the preacetabular process, but it is absent in PVL 3826 (MDE, 20 August 2014).;
{162 464 The depression on the ventral surface of the base of the postacetabular process in PVL 3827 does not reach the distal end of the process, contrasting with the condition in dinosauriforms (MDE, 20 August 2014).;
{162 472 The pubis has a groove in PVL 3827 (MDE, 20 August 2014).;
{163 358 Based on Nesbitt et al. (2014: 1364) (MDE, 11 November 2014).;
{163 384 The condition of this character cannot be confidently determined because the anterior margin of the coracoid is misssing (MDE, 11 November 2014).;
{163 455 Based on the orientation of the sacral rib facets and in agreement with the scoring of Nesbitt et al. (2014: character 270) (MDE, 11 November 2014).;
{163 507 Based on Nesbitt et al. (2014: character 323) (MDE, 11 November 2014).;
{163 522 Probably miscored by Nesbitt et al. (2014: character 337) (MDE, 11 November 2014).;
{163 528 Although scored as a low crest-shaped structure by Nesbitt et al. (2014: character 339), the tubercle is considerably better developed than in non-pseudosuchian archosauromorphs (MDE, 11 November 2014).;
{163 535 The condition of this character is extremely similar to that of Smilosuchus and Parasuchus (MDE, 10 November 2014).;
{166 24 Based on Butler et al. (2014) (MDE, 22 August 2014).;
{166 326 Based on Wu and Russell (2001: 44) (MDE, 22 April 2014).;
{166 369 Based on Wu and Russell (2001: 45) (MDE, 22 April 2014).;
{167 58 Both character-states are present in MCZ 4117 (MDE, 18 September 2014).;
{167 65 Based on Lecuona (2013) and Butler et al. (2014) (MDE, 22 August 2014).;
{167 257 Based on the right side of MCZ 4117 (MDE, 22 August 2014).;
{167 283 Based on MCZ 4116 (MDE 5 October 2014).;
{167 293 Based on MCZ 4116 (MDE 5 October 2014).;
{167 294 Based on MCZ 4116 (MDE 5 October 2014).;
{169 131 The dorsoventral compression of the skull makes the determination of this feature equivocal (MDE, 27 December 2021);
{172 483 Based on Nesbitt (2005: 37) (MDE, 23 December 2015).;
{175 385 Da auf der Innenseite der rechten SchultergUrtelhalfte von der eigentlichen Gelenkflache nichts zusehen ist, muss diese leicht lateralwarts gerichtet gewesen sein (Krebs 1965 page 58);
{187 88 Based on Gower (1999: 39) (MDE, 22 April 2014).;
{187 219 Based on Gower (2002) (MDE, 19 September 2014).;
{187 535 Inferred from the morphology of the distal end of tibia (MDE, 9 October 2014);
{192 64 The dorsal process is present in UFRGS-PV-0152-T and the dorsal prong of the anterior tip of the jugal figured by Parrish 1993 for UFRGS-PV-0156-T might be a dorsal proess extending from the maxilla (MDE, 4 September 2014).;
{192 208 Based on Mastrantonio et al. (2013) (MDE, 4 September 2014).;
{192 219 Based on Mastrantonio et al. (2013) (MDE, 19 September 2014).;
{192 249 Based on Mastrantonio et al. (2013) (MDE, April 12 2015).;
{196 1 ratio=0.56-0.58 (MDE, 20-2-2019);
{196 30 The type of preservation and size of the specimen probably turn very difficult to determine the condition of this character (MDE, 20-2-2019);
{196 51 The type of preservation and size of the specimen probably turn very difficult to determine the condition of this character (MDE, 20-2-2019);
{196 261 Based on the scoring of Britt et al. (2018) (MDE, 20-2-2019);
{196 369 Based on Wild (1984: 52) (MDE, 20-2-2019);
{198 30 The type of preservation and size of the specimen probably turn very difficult to determine the condition of this character (MDE, 23 August 2019);
{206 20 ratio = <0.41 (MDE, 11 November 2019);
{206 850 Scored from CT data (MDE, 1 December 2021);
{208 370 Based on Bonaparte (1975: fig. 6) (MDE, 19 April 2014).;
{208 535 The supposed second basin on the astragalus, if present, is placed posterolateral rather than posteromedial (PVL 3871), contrasting with Riojasuchus, suchians and Lagerpetidae (MDE, 20 October 2014).;
{214 803 I think that the apparent presence of a mediolateral scar is an artefact because of the lost of cortical bone (MDE, November 4 2019);
{218 220 Based on Bittencourt et al. (2014: 8) (MDE, 21 August 2014).;
{219 257 Inferred from the well-preserved and defined facet on the ventral surface of the skull roof of ZPAL Ab IIII 1223 (MDE, April 20 2015).;
{219 356 Based on ZPAL Ab III 1930 (MDE, April 23 2015);
{219 379 Based on ZPAL Ab III 1975 (MDE, 30 April 2015).;
{219 380 Based on ZPAL Ab III 1975 (MDE, 30 April 2015).;
{219 465 Based on ZPAL Ab III 364 (MDE, April 23 2015);
{219 484 Based on Nesbitt (2011: 140) (MDE, 24 April 2014).;
{220 14 The secondary antorbital fenestra occurs is defined by the premaxilla, maxilla and sometimes nasal. In Heterodontosaurus the accesory antorbital fenestra is completely enclosed by the maxilla within the antorbital fossa and, as a result, is not considered homologous to the former (MDE, 27 August, 2014).;
{220 287 Based on Sereno (2012: 107) (MDE, 27 August 2014).;
{220 288 Based on Sereno (2012: 107) (MDE, 27 August 2014).;
{220 412 The bones interpreted by Sereno (2012) as sternal plates are likely uncinate processes (MDE, 27 August 2014).;
{221 269 Based on MACN-Pv 18060 (MDE, 26 August 2014).;
{221 443 This scorings is based on the reinterpretation of the distal carpals preserved in PVSJ 373 as dc2-5 instead of dc1-4 (MDE, April 13 2015).;
{221 575 Based on PVSJ 373 (MDE, 13 October 2014).;
{222 95 Based on Porro et al. (2015: page 17) (MDE, 1-3-2019);
{224 507 ratio = 0.18 based on PVSJ 745 (MDE, 23 December 2021);
{225 19 ratio=0.50 (MDE, 22-2-2019);
{225 75 ratio=1.10 (MDE, 22-2-2019);
{226 74 21-22 tooth positions in the dentary (MDE, 15-3-2019);
;
